# Supplementary material for: Positive impact of the COVID-19 pandemic? A longitudinal study on the impact of the COVID-19 pandemic on physicians’ work experiences and employability
Source: PubMed Central journal article supplement — BMJ Open. 2021 Dec 3;11(12):e050962. doi: 10.1136/bmjopen-2021-050962 (PMC8646962; doi:10.1136/bmjopen-2021-050962), 2021-12-03
Supplement: bmjopen-2021-050962.draft_revisions.pdf [file bmjopen-2021-050962.draft_revisions.pdf]

# BMJ Open

BMJ Open is committed to open peer review. As part of this commitment we make the peer review history of every article we publish publicly available.

When an article is published we post the peer reviewers' comments and the authors' responses online. We also post the versions of the paper that were used during peer review. These are the versions that the peer review comments apply to.

The versions of the paper that follow are the versions that were submitted during the peer review process. They are not the versions of record or the final published versions. They should not be cited or distributed as the published version of this manuscript.

BMJ Open is an open access journal and the full, final, typeset and author-corrected version of record of the manuscript is available on our site with no access controls, subscription charges or pay-per-view fees (<http://bmjopen.bmj.com>).

If you have any questions on BMJ Open's open peer review process please email [info.bmjopen@bmj.com](mailto:info.bmjopen@bmj.com)

# BMJ Open

## A positive impact of crisis? A longitudinal study on the impact of the Covid-19 pandemic on physicians' work experiences and employability

|                               |                                                                                                                                                                                                                                                                                                                              |
|-------------------------------|------------------------------------------------------------------------------------------------------------------------------------------------------------------------------------------------------------------------------------------------------------------------------------------------------------------------------|
| Journal:                      | <i>BMJ Open</i>                                                                                                                                                                                                                                                                                                              |
| Manuscript ID                 | bmjopen-2021-050962                                                                                                                                                                                                                                                                                                          |
| Article Type:                 | Original research                                                                                                                                                                                                                                                                                                            |
| Date Submitted by the Author: | 07-Mar-2021                                                                                                                                                                                                                                                                                                                  |
| Complete List of Authors:     | Leeuwen, Evelien; UMC Utrecht; Utrecht University School of Governance<br>Taris, Toon; Utrecht University, Social, Health and Organizational Psychology<br>van Rensen, Elizabeth; UMC Utrecht<br>Knies, Eva; Utrecht University School of Governance<br>Lammers, Jan-Willem; UMC Utrecht, Department of Respiratory Medicine |
| Keywords:                     | COVID-19, Human resource management < HEALTH SERVICES ADMINISTRATION & MANAGEMENT, MENTAL HEALTH                                                                                                                                                                                                                             |
|                               |                                                                                                                                                                                                                                                                                                                              |

SCHOLARONE™  
Manuscripts

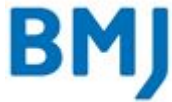

I, the Submitting Author has the right to grant and does grant on behalf of all authors of the Work (as defined in the below author licence), an exclusive licence and/or a non-exclusive licence for contributions from authors who are: i) UK Crown employees; ii) where BMJ has agreed a CC-BY licence shall apply, and/or iii) in accordance with the terms applicable for US Federal Government officers or employees acting as part of their official duties; on a worldwide, perpetual, irrevocable, royalty-free basis to BMJ Publishing Group Ltd ("BMJ") its licensees and where the relevant Journal is co-owned by BMJ to the co-owners of the Journal, to publish the Work in this journal and any other BMJ products and to exploit all rights, as set out in our [licence](#).

The Submitting Author accepts and understands that any supply made under these terms is made by BMJ to the Submitting Author unless you are acting as an employee on behalf of your employer or a postgraduate student of an affiliated institution which is paying any applicable article publishing charge ("APC") for Open Access articles. Where the Submitting Author wishes to make the Work available on an Open Access basis (and intends to pay the relevant APC), the terms of reuse of such Open Access shall be governed by a Creative Commons licence – details of these licences and which [Creative Commons](#) licence will apply to this Work are set out in our licence referred to above.

Other than as permitted in any relevant BMJ Author's Self Archiving Policies, I confirm this Work has not been accepted for publication elsewhere, is not being considered for publication elsewhere and does not duplicate material already published. I confirm all authors consent to publication of this Work and authorise the granting of this licence.

1  
2  
3 **Title: A positive impact of crisis? A longitudinal study on the impact of the Covid-19 pandemic**  
4 **on physicians' work experiences and employability**  
5  
6  
7  
8

9 Evelien H. van Leeuwen, MSc (corresponding author)

10 University Medical Center Utrecht, Heidelberglaan 100, 3584 CX Utrecht, the Netherlands

11  
12  
13 Tel. +31 (0)30-253 81 01

14  
15  
16 [e.h.vanleeuwen@umcutrecht.nl](mailto:e.h.vanleeuwen@umcutrecht.nl)  
17  
18

19  
20 Prof. dr. Toon W. Taris

21  
22 Utrecht University Social Sciences, Heidelberglaan 1, 3584 CS Utrecht, the Netherlands

23  
24 [a.w.taris@uu.nl](mailto:a.w.taris@uu.nl)  
25  
26  
27

28 Dr. Elizabeth L. J. van Rensen

29  
30 University Medical Center Utrecht, Heidelberglaan 100, 3584 CX Utrecht, the Netherlands

31  
32 [e.l.j.vanrensen@umcutrecht.nl](mailto:e.l.j.vanrensen@umcutrecht.nl)  
33  
34  
35

36 Prof. dr. Eva Knies

37  
38 Utrecht University School of Governance, Bijlhouwerstraat 6, 3511 ZC Utrecht, the Netherlands

39  
40 [e.knies@uu.nl](mailto:e.knies@uu.nl)  
41  
42  
43  
44

45 Prof. Dr. Jan-Willem J. Lammers

46  
47 University Medical Center Utrecht, Heidelberglaan 100, 3584 CX Utrecht, the Netherlands

48  
49 [Jlammers026@gmail.com](mailto:Jlammers026@gmail.com)  
50  
51  
52  
53  
54  
55  
56  
57  
58  
59  
60

## Abstract

**Objective** – The Covid-19 pandemic places an enormous demand on physicians around the world.

The aim of this study was to examine the impact of a crisis on physicians' work experiences and their ability and willingness to continue working in their profession until retirement (i.e. their employability). Attention for this is important to maintain a healthy and sustainable workforce.

**Design** - A longitudinal approach was used. Survey data were collected on three moments: before (May 2019), in the early phase (May 2020) and in a later phase (November 2020) of the Covid-19 pandemic in The Netherlands. Data were compared in repeated-measures analyses of variance (RM ANOVA).

**Setting** – This study took place among physicians of two hospitals in a large city in the Netherlands.

**Participants** – 165 hospital physicians with surgical, medical and other specialties participated in this study.

**Results** – Physicians' employability significantly increased from the time prior to the crisis, the Covid-19 pandemic, compared to the period during the crisis. Employability differs among physicians with surgical, medical and other specialties. Furthermore, physicians experienced a lower emotional, physical and quantitative workload in the first peak of the Covid-19 pandemic compared to the time before. Moreover, physicians experienced the most stress from the impact of Covid-19 on their work in general and from combining work and private life.

**Conclusions** – This study shows that physicians' employability and work experiences are affected by a crisis, the Covid-19 pandemic specifically. Work experiences vary for physicians with different specialties. These varieties stress the importance of attention for physicians' individual needs and challenges regarding working during a crisis and the possibility of continuing work in the aftermath of a crisis. Based on this, tailor-made solutions can be offered to physicians. This is important to maintain a healthy and employable workforce which is essential for a sustainable health care system.

### Strengths and limitations of this study

- The study captured the work experiences of physicians prior to and during a crisis, the Covid-19 pandemic specifically, allowing for within-person comparisons

- The study used a longitudinal study approach with data collected at three moments in time
- Despite the highly relevant longitudinal study approach, this has also resulted in participants dropout

## Introduction

Emerging crises, such as infectious pandemic diseases, place an enormous strain on health care workers [1]. They are especially vulnerable during pandemics, given the risk of exposure to the virus, concerns about infecting their loved ones, shortages of personal protective equipment, extended workload, and involvement in emotional and ethical decision making [2,3]. Crises, such as the recent Covid-19 pandemic, are likely to have implications for health care workers' ability and willingness to work in the short-run and to continue their essential work on the frontlines in the long-run [4]. Crises may for instance result in stress [5], illness, insomnia [6], fear for becoming infected [7], hesitation to work [8] or a lack of motivation to work [9] in the short-run. From previous research on crises we know that a pandemic may even result in more adverse consequences for physicians in the long-run, such as developing burn-out, psychological distress, and post-traumatic stress-disorder [10,11].

The possible consequences of crises for physicians make it important to monitor physicians' work experiences (i.e. their perceived workload, job autonomy and stress) and their ability and willingness to continue working in their profession (i.e. employability). It is important to prevent adverse consequences, because health care workers' well-being might be at stake. Studying physicians' work experiences helps to monitor their ability to work in the short-term. Especially job demands, such as workload, and job resources such as job autonomy have been shown to be important factors that affect well-being, stress and performance [12–14]. Furthermore, employability provides an indication of physicians' ability and willingness to continue working in their profession. Research has shown that employability positively affects well-being and performance [15,16]. Research has shown that a crisis, such as the Covid-19 pandemic, is a “career shock” referring to a disruptive and extraordinary event that is caused by factors outside an individual's control and triggers a deliberate thought process concerning ones' career [17]. This may result in people reconsidering their position, leaving their

1  
2  
3 profession or lower job or career satisfaction [18]. This challenges employability which is especially  
4  
5 problematic in a health crisis as employable physicians are necessary to handle the high demands for  
6  
7 health care, and in the aftermath of the health crisis due to delayed operations and treatments for  
8  
9 instance.  
10

11  
12  
13 Despite the relevance of focusing on employability and work experiences, a search on Google Scholar  
14  
15 shows that research on this is lacking behind, both in quantity as well as in timing, in contrast to the  
16  
17 large number of research examining the medical consequences of the Covid-19 pandemic. In this  
18  
19 study we examine the impact of a health crisis on physicians' work experiences and employability, by  
20  
21 addressing the following research question in the context of a three-wave prospective study: "What is  
22  
23 the impact of a health crisis on physicians' work experiences (i.e. perceived workload, job autonomy  
24  
25 and stress) and their ability and willingness to continue working in their profession (i.e.  
26  
27 employability)?" The Covid-19 pandemic is examined as a case to study this question. Understanding  
28  
29 the impact of a health crisis on physicians' work is important to be prepared for future outbreaks of  
30  
31 health crises as maintaining a healthy and employable workforce is essential for a sustainable health  
32  
33 care system. These themes, and topics related to this, receive little attention, especially in a medical  
34  
35 setting. Physicians tend to self-ignore attention for their well-being and health systems poorly support  
36  
37 this [19] emphasizing the importance of this research.  
38  
39  
40  
41  
42

43 This study examines the impact of a health crisis on physicians with varying specialties. Previous  
44  
45 studies have shown that the impact of pandemics varies for health care workers working in different  
46  
47 departments [20,21]. For instance, those who work in emergency departments, intensive care units,  
48  
49 and isolation wards have a greater risk of developing adverse psychiatric outcomes than those working  
50  
51 in other departments [21]. Despite differences between physicians, it is likely that pandemics, such as  
52  
53 the Covid-19 pandemic, affect them all to some extent as their work has suddenly changed, both in  
54  
55 terms of content (e.g. change in cases, increase in the use of video consults) and location (e.g. working  
56  
57 from home or in different departments), and due to an uncertain future. These changes may result in  
58  
59 various job demands such as a high (emotional) workload or stress [1,22] which may vary between  
60

1  
2  
3 groups of physicians. More research is needed to understand the impact of pandemics on physicians  
4  
5 with different specialties. This study examines physicians with surgical, medical, and other specialties  
6  
7 to examine the impact on their work and possible differences between specialties.  
8  
9

10  
11 Studies examining the psychological effects of pandemics (e.g. SARS, H1N1 influenza and avian  
12  
13 influenza H5N1) often use cross-sectional methods [6,9–11,23]. Also recent studies into the Covid-19  
14  
15 pandemic mainly rely on cross-sectional methods [6,23]. A disadvantage of using cross-sectional  
16  
17 methods is that the dynamics of pandemics cannot be captured with this approach. The impact of  
18  
19 pandemics on health care workers has been shown to vary in different phases of a crisis. During initial  
20  
21 outbreak health care workers perceive feelings of extreme vulnerability, uncertainty, anxiety and threat  
22  
23 while mental health problems such as depression are more likely to develop in a later phase [24]. For  
24  
25 this reason, a longitudinal approach where experiences are measured at multiple points in time is more  
26  
27 appropriate to study the impact of a pandemic. In this study we use a longitudinal approach by  
28  
29 examining physicians experiences at three moments in time.  
30  
31  
32

33 In addition, a meta-analysis shows that these studies often use retrospective questions where  
34  
35 respondents are asked for their past experiences [25]. This approach is problematic as psychologists  
36  
37 and survey methodologists have shown that subjective experiences are poorly represented in memory.  
38  
39 Retrospective questions often ask respondents for information that they cannot provide with any  
40  
41 validity [26]. Therefore, examining behaviour and experiences by using real-time data is highly  
42  
43 preferable [26]. This is done in this study by asking for physicians' current behaviour, at the three  
44  
45 moments of taking the surveys.  
46  
47  
48  
49  
50  
51  
52  
53  
54  
55  
56  
57  
58  
59  
60



## Method

Three surveys were sent to physicians in two hospitals in a large Dutch city, an academic hospital and a general hospital. One survey was sent as part of another study [27]. This survey was sent in May 2019 (T1), prior to the Covid-19 outbreak. A second survey was sent in May 2020, in an early phase of the Covid-19 pandemic. This was one month after the first peak of Covid-19 infections in the Netherlands (RIVM, 2020). The long period in which the Covid-19 pandemic dominates the world, made it relevant to add a measurement in a later phase of the pandemic to examine the longer-term consequences of working during a crisis. Therefore, a third survey was sent in November 2020 (T3), one month after the second peak of Covid-19 in the Netherlands. When the surveys were sent at T2 and T3, many countries, including the Netherlands, were still partly or fully in lockdown, social distancing was required and the number of patients infected with Covid-19 was high.

Participants were recruited through promotional presentations and through an internal mailing list. 165 physicians participated in this study at T1. These 165 physicians were invited by e-mail to complete a second and third survey. 93 physicians completed the survey at T2, 98 physicians at T3. We compared participants who completed all three surveys (T1, T2 and T3) ( $n=75$ ) with participants who only completed the survey sent at T1 ( $n=72$ ). Multivariate analysis of variance indicated that there were no significant differences between these participants in terms of age ( $F(1,124)=0.037, p=0.849$ ), hours worked according to contract ( $F(1,135)=0.555, p=0.458$ ), functional tenure ( $F(1,133)=0.591, p=0.443$ ), and organisational tenure ( $F(1,129)=0.804, p=0.371$ ). For the dichotomous variables gender, hospital type (general vs. academic), type of specialism (surgical, medical vs. other, following the categorization of [28]) and type of employment contract (employed by the hospital vs. independently established) we conducted chi-square tests, again showing that there were no significant differences between participants that dropped out of this study and the participants that completed all three surveys (all  $p$ 's > 0.452).

Physicians provided several reasons for not completing the surveys sent at T2 and/or T3. At T2, 1 physician left the hospital, and 10 physicians were on a leave (either a pregnancy leave, holiday leave

or were abroad). At T3, 2 physicians left the hospital, 10 physicians were on a leave, and 1 physician was too busy to complete the survey. These reasons, apart from the latter, are unlikely to result in biased outcomes. This, together with the non-significant results for the non-response analysis, show that there are no significant differences between the participants who dropped out of this study and the participants who completed all three surveys. The result section reports on the results of the analyses based on the data from participants who completed the surveys on T1, T2 and T3 ( $n=75$ ). Table 1 presents the demographics of the respondents.

Table 1: Demographics of participants ( $n=75$ )

|                                                     |                                                                        |
|-----------------------------------------------------|------------------------------------------------------------------------|
| <b>Gender</b>                                       | Male: $n=28$ (37%)<br>Female: $n=47$ (63%)                             |
| <b>Age</b>                                          | $M=44.9$ , $SD=7.8$                                                    |
| <b>Work hours according to contract</b>             | $M=41.4$ , $SD=11.12$                                                  |
| <b>Functional tenure (years)</b>                    | $M=11.6$ , $SD=8.4$                                                    |
| <b>Organizational tenure (years)</b>                | $M=9.6$ , $SD=8.0$                                                     |
| <b>Type of employment contract</b>                  | Self-employed: $n=10$ (13%)<br>Contracted: $n=65$ (87%)                |
| <b>Specialty</b>                                    | Surgical: $n=14$ (19%)<br>Medical: $n=35$ (47%)<br>Other: $n=26$ (35%) |
| <b>Involved in care for Covid-19 patients at T2</b> | Yes: $n=24$ (32%)<br>No: $n=51$ (68%)                                  |
| <b>Involved in care for Covid-19 patients at T3</b> | Yes: $n=19$ (25%)<br>No: $n=56$ (75%)                                  |

Participants provided informed consent at the start of each survey stating that participation is voluntary, outcomes are held confidential, participants can withdraw from the study at any time, and all study material was anonymized and saved on a protected server. The questions addressed sociodemographic characteristics (gender, age), job characteristics (specialism, occupational and

1  
2  
3 organizational tenure, autonomy and workload) and involvement with care for patients with the  
4  
5 Covid-19 virus. Further, physicians were asked to rate their emotional workload (5 items: “*Is your job*  
6  
7 *emotionally demanding?*”, “*Are you confronted in your work with things that affect you personally?*”,  
8  
9 “*Are you in your work in contact with difficult patients or their relatives?*”, “*Do you have to convince*  
10  
11 *or persuade people for your job?*” and “*Do you encounter emotionally demanding events in your*  
12  
13 *work?*”, [29]), quantitative workload (3 items: “*Do you have too much work to do?*”, “*Do you have to*  
14  
15 *put in extra effort to finish your work?*” and “*Do you have to hurry?*”, [29]), physical workload (1  
16  
17 item: “*My job is physically demanding*”, [30]), and job autonomy (3 items: “*The job allows me to*  
18  
19 *decide on my own how to go about doing my work*”, “*The job provides me with significant autonomy*  
20  
21 *in making decisions*” and “*The job gives me a chance to use my personal initiative or judgment in*  
22  
23 *carrying out the work*”, [31]). Answers were given on a 5-point Likert scale (1=never, 5=very often).  
24  
25  
26  
27

28  
29 Other questions asked for physicians’ perceptions on their own employability (2 items measured  
30  
31 ability: “*I am [physically (item 1)/ mentally (item 2)] able to continue to work until the age of 67 in*  
32  
33 *my current profession*”; 1 item measured willingness: “*I am willing to continue to work until the age*  
34  
35 *of 67 in my current profession*”, [32]), job satisfaction (1 item: “*Generally speaking, I am very*  
36  
37 *satisfied with my job*”, [33]) and career satisfaction (1 item: “*Generally speaking, I am very satisfied*  
38  
39 *with my career*”, [34]). Answers were given on a 5-point Likert scale (1=totally disagree, 5=totally  
40  
41 agree).  
42  
43  
44

45  
46 The surveys sent on T2 and T3 additionally asked for perceived stress associated with the Covid-19  
47  
48 situation. This was measured with items that are relevant for employees working during the Covid-19  
49  
50 pandemic. Some are specifically related to the work of health care workers as they may experience  
51  
52 stress for the health of their patients or colleagues who have a higher risk of infection (10 newly-  
53  
54 developed items: “*How often do you experience stress caused by Covid-19 [for work (item 1)/ about*  
55  
56 *the measures taken against Covid-19 (item 2)/ for your work-life balance (item 3)/ messages in the*  
57  
58 *media (item 4)/ yourself (item 5)/ love ones (item 6)/ your patients (item 7)/ your colleagues (item 8)/*  
59  
60

1  
2  
3 *the hospital where you work* (item 9)/ *the profession of physicians*" (item 10)] rated on a 5-point Likert  
4  
5 scale (1=never, 5=very often).  
6  
7

8  
9  
10 The University Medical Center Utrecht confirmed that this study fell outside the scope of the Dutch  
11 Law on Medical Research (WMO) and therefore formal ethical approval was not required (METc  
12 2019, 19/109).  
13  
14

### 17 18 **Data analysis**

19  
20 A series of 3 (Time: T1 vs. T2 vs. T3) × 3 (Group: surgical, medical or other specialty) repeated-  
21  
22 measures analyses of variance (RM ANOVA) was performed with planned contrasts on Time  
23  
24 (Helmert contrasts T1 vs. T2/T3) and with Time as a within-subject factor and Group as a between-  
25  
26 subject factor.  
27  
28  
29

## 30 31 **Results**

### 32 33 **Employability is higher during the Covid-19 pandemic than before**

34  
35 RM ANOVAs show that physicians' perceived employability significantly increases over time (Figure  
36  
37 1). In specific, physicians mental and physical ability to work and to continue working in their current  
38  
39 profession significantly increase from the time before the Covid-19 pandemic (T1) compared to the  
40  
41 period during the Covid-19 pandemic (T2 and T3) ( $F(1,67)=4.954, p=0.029^*$ ,  $partial \eta^2=0.069$ ).

42  
43 Similarly, physicians' willingness to work and to continue to work significantly increases from the  
44  
45 time before the pandemic compared to the period during the pandemic ( $F(1,65)=11.125, p=0.001^{**}$ ,  
46  
47  $partial \eta^2=0.146$ ).  
48  
49

50  
51 **Please insert: Figure 1: Mean scores for employability on T1, T2 and T3**  
52  
53

54  
55 We observe a similar significant increase in physicians' career satisfaction from prior to the Covid-19  
56  
57 pandemic (T1) to during the Covid-19 pandemic (T2 and T3) ( $F(1,72)=6.294, p=0.014^*$ ,  $partial$   
58  
59  $\eta^2=0.080$ ). No significant change was found for physicians' job satisfaction in this period.  
60

### Employability differs between specialties

Further analyses show that employability differs among physicians with surgical, medical and other specialties (Figure 2). At T1, surgical doctors are significantly less positive about their employability than physicians with medical or other specialties (ability:  $F(2,71)=6.412, p=0.003^{**}$ , partial  $\eta^2=0.153$ ; willingness  $F(2,68)=4.200, p=0.019^*$ , partial  $\eta^2=0.110$ ). Further, during the first phase of the Covid-19 pandemic (T2), the employability of surgical doctors is still significantly lower than that of physicians with medical or other specialties (ability:  $F(2,70)=6.492, p=0.003^{**}$ , partial  $\eta^2=0.156$ ; willingness:  $F(2,71)=5.941, p=0.004^{**}$ , partial  $\eta^2=0.143$ ). At T3 there are no significant differences anymore between the employability of the three groups of medical specialties. Table 2 summarizes the differences in employability over time among physicians with surgical, medical, and other specialties.

*Please insert: Figure 2: Mean scores for employability on T1, T2 and T3 for physicians with surgical, medical and other specialties*

*Table 2: Results RM ANOVAs employability on T1, T2 and T3 for physicians with surgical, medical and other specialties (n=75)*

| Variable                    | Time | Surgical |      | Medical |      | Other |      | F-values                      | Partial $\eta^2$ |
|-----------------------------|------|----------|------|---------|------|-------|------|-------------------------------|------------------|
|                             |      | M        | SD   | M       | SD   | M     | SD   |                               |                  |
| Ability to continue working | T1   | 3.00     | 1.22 | 3.83    | 0.79 | 3.96  | 0.64 | $F(2,71)=6.412, p=0.003^{**}$ | 0.153            |
|                             | T2   | 3.18     | 1.05 | 3.88    | 0.81 | 4.10  | 0.52 | $F(2,70)=6.492, p=0.003^{**}$ | 0.156            |
|                             | T3   | 3.64     | 1.08 | 3.91    | 0.96 | 4.13  | 0.71 | $F(2,69)=1.256, p=0.291$      | X                |
| Willingness to continue     | T1   | 2.08     | 1.26 | 3.17    | 1.22 | 3.00  | 1.04 | $F(2,68)=4.200, p=0.019^*$    | 0.110            |

|         |    |      |      |      |      |      |      |                                     |       |
|---------|----|------|------|------|------|------|------|-------------------------------------|-------|
| working | T2 | 2.29 | 1.07 | 3.38 | 0.99 | 3.12 | 0.99 | $F(2,71)=5.941$ ,<br>$p=0.004^{**}$ | 0.143 |
|         | T3 | 3.00 | 1.24 | 3.39 | 1.20 | 3.42 | 1.06 | $F(2,70)=0.700$ ,<br>$p=0.500$      | X     |

\*=significant at the 0.05 level (2-tailed), \*\* significant at the 0.01 level (2-tailed)

### Physicians' work experiences during the Covid-19 pandemic

We have further examined how physicians experience their work during the Covid-19 pandemic.

Table 3 shows that physicians experience a significant lower emotional workload ( $F(2,70)=10.579$ ,  $p<0.001^{**}$ ), physical workload ( $F(2,72)=5.159$ ,  $p=0.008^{**}$ ), and quantitative workload ( $F(2,62)=5.702$ ,  $p=0.005^{**}$ ) during an early phase of the Covid-19 pandemic (T2), compared to the time before the pandemic (T1). In a later phase of the pandemic (T3), the experience of workload showed a tendency to return to the pre-pandemic levels (T1) (figure 3).

**Please insert: Figure 3: Mean scores for work characteristics on T1, T2 and T3**

Table 3: Experience of work characteristics on T1, T2 and T3 (n=75)

| Work characteristics  | T1   |      | T2   |      | T3   |      | F-values                             | $\eta^2$ |
|-----------------------|------|------|------|------|------|------|--------------------------------------|----------|
|                       | M    | SD   | M    | SD   | M    | SD   |                                      |          |
| Emotional workload    | 2.70 | 0.67 | 2.45 | 0.63 | 2.51 | 0.67 | $F(2,70)=10.579$ ,<br>$p<0.001^{**}$ | 0.232    |
| Physical workload     | 2.61 | 0.98 | 2.34 | 0.93 | 2.65 | 0.99 | $F(2,72)=5.159$ ,<br>$p=0.008^{**}$  | 0.125    |
| Quantitative workload | 3.45 | 1.11 | 2.99 | 1.03 | 3.22 | 1.11 | $F(2,62)=5.702$ ,<br>$p=0.005^{**}$  | 0.155    |
| Job autonomy          | 3.82 | 0.80 | 3.64 | 0.54 | 3.76 | 0.60 | $F(2,63)=2.417$ ,<br>$p=0.097$       | x        |

\*=significant at the 0.05 level (2-tailed), \*\* significant at the 0.01 level (2-tailed)

### Stress factors during the Covid-19 pandemic

Physicians have further reported to what extent they experience stress in several areas because of the Covid-19 pandemic (Figure 4). During an early phase of the crisis (T2), physicians experienced the most stress from combining work and private life ( $M=2.63$ ;  $SD=1.27$ ), from work in general ( $M=2.49$ ;  $SD=0.95$ ) and for the possible impact of Covid-19 on their loved ones' health ( $M=2.33$ ;  $SD=0.93$ ).

They experienced the least stress for the possible consequences of Covid-19 on themselves ( $M=1.85$ ;  $SD=0.85$ ). During a later phase of the Covid-19 pandemic (T3), physicians reported to experience the most stress from their work in general ( $M=2.55$ ;  $SD=1.00$ ), from combining work and private life ( $M=2.47$ ;  $SD=1.12$ ), and for the health of their patients ( $M=2.38$ ;  $SD=0.98$ ). Again, they reported to experience the least stress for the possible impact of Covid-19 on themselves ( $M=2.03$ ;  $SD=0.72$ ).

*Please insert: Figure 4: Mean scores on how often physicians experience stress in several areas on T2 and T3 caused by Covid-19*

### Discussion

The aim of this study was to provide insight into the impact of a crisis, the Covid-19 pandemic specifically, on physicians' employability and work experiences. A longitudinal approach was used, which allowed us to compare physicians work experiences during the Covid-19 pandemic with the situation prior to the pandemic.

Perhaps the most interesting finding of the present study was the fact that the perceived employability of physicians was significantly *higher* during the pandemic than it was before. Specifically, the results show that physicians' employability increases in the time prior to the Covid-19 pandemic to the early phase of the Covid-19 pandemic and continues to increase in a later phase of the Covid-19 pandemic.

This goes contrary to our expectations since other studies found that physicians work motivation decreases [9] and stress and burn-out increase during previous pandemics [10,11]. These different conclusions may be the result of a different approach taken in our study compared to these past

1  
2  
3 studies. Earlier studies draw conclusions from cross-sectional, retrospective data. Recall biases are  
4  
5 inherent to cross-sectional studies using retrospective techniques to understand a change in experience  
6  
7 over time [26]. Studies have shown that when respondents have reason to believe in change, they will  
8  
9 report change when they are asked to reflect on the past. Even when no change has occurred [26]. In a  
10  
11 crisis situation, such as a pandemic, respondents may believe that they were more positive before the  
12  
13 outbreak of a pandemic than during the pandemic. This perspective is likely to be strengthened by the  
14  
15 public debate where the negative impact of the pandemic on health care workers has been frequently  
16  
17 emphasized. This study used real-time data collection, instead of using retrospective methods. It asked  
18  
19 physicians about things that they *can* report, namely their current experiences at the moment of taking  
20  
21 the survey, i.e. they reported on their current feelings, not on their perceptions of their feelings in the  
22  
23 past. This approach allows to draw considerably more reliable conclusions about physicians work  
24  
25 experiences prior to the crisis and during the crisis than is possible using non-longitudinal  
26  
27 methodologies.  
28  
29  
30  
31

32  
33 There are various substantive explanations for the increase in employability. It could be related to a  
34  
35 change in physicians' work characteristics, or an increase in societal appreciation during the  
36  
37 pandemic. This study shows that physicians experienced a lower workload during an early phase of  
38  
39 the Covid-19 pandemic compared to the time prior to the pandemic. Workload has also been shown to  
40  
41 correlate with employability. Therefore, a lower workload at this time could possibly explain why  
42  
43 physicians perceive to be better able to continue working until their retirement. This is in line with  
44  
45 research showing that job demands, such as workload, positively relate to concepts related to well-  
46  
47 being and self-reported health [e.g. 14]. This suggests that a period of lower job demands may be  
48  
49 beneficial for an individuals' well-being or related concepts such as employability. More research is  
50  
51 needed to examine this further.  
52

53  
54 More appreciation for physicians work by society [8] may provide an alternative explanation  
55  
56 for the increase in physicians' employability. Physicians and other health care workers have been  
57  
58 portrayed as 'heroes' [35], and citizens have expressed their support through a public applause and by  
59  
60 placing white t-shirts with red hearts in front of their windows. Physicians are on the short-list of 'vital



1  
2  
3 professions', which gives them certain privileges during the pandemic compared to people with other  
4 professions (e.g. they may use public transport and their children can still go to daycare and school).  
5  
6 They are further given a prominent role in dealing with the crisis. Many physicians are members of  
7  
8 expert bodies that advise on the course of governmental action. These examples might have resulted in  
9  
10 physicians feeling highly appreciated during the Covid-19 crisis, which may have boosted their ability  
11  
12 and willingness to work and to continue their essential and meaningful work.  
13  
14  
15  
16  
17  
18

19 Physicians employability differed across surgical, medical and other specialties. This difference is also  
20  
21 apparent before the Covid-19 pandemic. This is in line with previous studies showing that physicians  
22  
23 with different specialties experience their work differently. There are for instance significant  
24  
25 differences in job stressors, demands and resources among medical specialties [e.g. 36]. Another  
26  
27 interesting finding is that the employability of physicians with surgical specialties increased stronger  
28  
29 from the time prior to the Covid-19 pandemic to the time during the Covid-19 pandemic compared to  
30  
31 physicians with medical or other specialties. We tested whether this difference is caused by the degree  
32  
33 of involvement with care for Covid-19 patients, but this was not the case. Other factors might explain  
34  
35 this difference. Physicians with different specialties had very diverse roles during the Covid-19  
36  
37 pandemic. While some physicians were directly involved in taking care for Covid-19 patients, or were  
38  
39 part of crisis teams, making very long workdays, other physicians work was significantly reduced due  
40  
41 to postponed or cancelled non-Covid related care [37]. Therefore, the job demands of physicians with  
42  
43 different specialties varied during the Covid-19 pandemic. For example, job demands for physicians  
44  
45 with surgical specialties could be lower during the Covid-19 pandemic as they saw their work being  
46  
47 reduced due to the cancellations of operations. This could have reduced their (physical) workload  
48  
49 more strongly than the workload of physicians with medical or other specialties which could explain  
50  
51 the rise in their employability.  
52  
53  
54  
55  
56  
57  
58  
59  
60

## Limitations

This study has some limitations. First, although a longitudinal approach is highly relevant to understand the impact of a crisis over time, the disadvantage of this approach is the drop-out of participants. In this study, around one third of the participants did not complete all three surveys and were therefore excluded from the analyses. It is possible that nonresponders differed from responders, for example in terms of workload. However, non-significant non-response analyses show that it is unlikely that this has biased our results.

Second, this study is based on a sample of Dutch physicians limiting the generalizability of our findings to other countries. The Covid-19 pandemic is a global crisis that affected countries differently. Early evidence shows that health care workers experiences vary based on the country where they work [38,39]. Health care workers have dealt with a different proportion of Covid-19 infections and also the national differences in the organization of health care may have affected physicians work differently across countries.

## Study implications

This study contributes to the body of knowledge about the psychological impact of a crisis on health care workers. It shows that crisis, specifically the Covid-19 pandemic, do not necessarily negatively affect health care workers but may also result in positive outcomes (i.e. increasing employability). As physicians work experiences are dynamic, a longitudinal approach is necessary to capture the dynamics of a pandemic on physicians work experiences. Furthermore, this study is valuable to practice as the healthcare system's ability to cope during an influenza pandemic will depend, to a large extent, on the number of health care workers, including physicians, who are able and willing to work through the crisis [7]. This study can inform global health actors that develop human resource strategies for dealing with the aftermath of the Covid-19 outbreak on health care workers. This study shows that physicians with surgical, medical and other specialties experience the Covid-19 pandemic differently. Therefore, tailor-made human resource strategies seem appropriate that pay attention to the specific needs of individual physicians.

## Conclusion

This is the first study to provide evidence on the effects of the Covid-19 pandemic on physicians' employability and work experience, using a longitudinal approach with real-time data at three moments in time. We found evidence that physicians' employability significantly increased from the time prior to the pandemic to the period during the Covid-19 pandemic. Also, physicians experience a lower workload during the first peak of the Covid-19 pandemic compared to the time before the pandemic. At a later phase in the pandemic, their experiences of workload bounce back to initial levels. These results show that employability and work experiences vary, not only over time, but also in different phases of the crisis. Physicians further experience the most stress from the impact of Covid-19 on their work in general and from combining work and private life.

## Footnotes

**Funding:** This research received no specific grant from any funding agency in the public, commercial or not-for-profit sectors.

**Competing interests:** None declared.

**Patient and public involvement:** Patients and/or the public were not involved in the design, or conduct, or reporting, or dissemination plans of this research. The survey was co-constructed with the authors, some of them work within the hospital. The survey was also pilot tested with physicians who gave feedback on it.

**Patient consent for publication:** Not required.

**Ethics approval:** The Ethical Committee of the University Medical Center Utrecht confirmed that this study falls outside the scope of the Dutch Law on Medical Research (WMO) and therefore formal ethical approval was not required (METc 2019, 19/109).

**Data availability statement:** Raw data are available upon reasonable request. Ethical restrictions related to participant confidentiality prohibit the authors from making the dataset publicly available.

**Authors' contributions:** All authors conceptualized the research project. EvL coordinated the study and gathered participants. EvL analyzed the data and drafted the manuscript. All authors reviewed and

1  
2  
3 provided comments and revisions. TT, EvR, JWL and EK secured funding for the project. All authors  
4  
5 read and approved the final manuscript.  
6  
7  
8  
9  
10  
11  
12  
13  
14  
15  
16  
17  
18  
19  
20  
21  
22  
23  
24  
25  
26  
27  
28  
29  
30  
31  
32  
33  
34  
35  
36  
37  
38  
39  
40  
41  
42  
43  
44  
45  
46  
47  
48  
49  
50  
51  
52  
53  
54  
55  
56  
57  
58  
59  
60

For peer review only

## References

- 1 Ripp J, Peccoraro L, Charney D. Attending to the emotional well-being of the health care workforce in a New York city health system during the Covid-19 pandemic. *Acad Med* 2020;**64**:1–4. doi:10.1097/ACM.0000000000003414
- 2 Smith CC. The structural vulnerability of healthcare workers during COVID-19: Observations on the social context of risk and the equitable distribution of resources. *Soc Sci Med* 2020;**258**:1–4. doi:10.1016/j.socscimed.2020.113119
- 3 Pfefferbaum B, North CS. Mental health and the Covid-19 pandemic. *N Engl J Med* Published Online First: 2020. doi:10.1056/NEJMp2008017
- 4 Cooch N. The psychological impact of Covid-19 on physicians: Lessons from previous outbreaks. 02-06-2020. 2020.<https://www.practiceupdate.com/content/the-psychological-impact-of-covid-19-on-physicians-lessons-from-previous-outbreaks/100995/45?trendmd-shared=0> (accessed 9 Jul 2020).
- 5 Fargen KM, Leslie-Mazwi TM, Klucznik RP, *et al*. The professional and personal impact of the coronavirus pandemic on US neurointerventional practices: a nationwide survey The Pandemic and Neurointervention. *J Neurointerv Surg* 2020;**12**. doi:10.1136/neurintsurg-2020-016513
- 6 Lai J, Ma S, Wang Y, *et al*. Factors associated with mental health outcomes among health care workers exposed to coronavirus disease 2019. *JAMA Netw Open* 2020;**3**:1–12. doi:10.1001/jamanetworkopen.2020.3976
- 7 Ives J, Greenfield S, Parry JM, *et al*. Healthcare workers' attitudes to working during pandemic influenza: a qualitative study. *BMC Public Health* 2009;**9**:1–13. doi:10.1186/1471-2458-9-56
- 8 Vindrola-Padros C, Andrews L, Dowrick A, *et al*. Perceptions and experiences of healthcare workers during the COVID-19 pandemic in the UK. *BMJ Open* 2020;**10**:1–

- 1  
2  
3 8. doi:10.1136/BMJOPEN-2020-040503  
4  
5 9 Imai H, Matsuishi K, Ito A, *et al.* Factors associated with motivation and hesitation to  
6  
7 work among health professionals during a public crisis: a cross sectional study of  
8  
9 hospital workers in Japan during the pandemic (H1N1) 2009. *BMC Public Health*  
10  
11 2010;**10**:1–8. doi:10.1186/1471-2458-10-672  
12  
13  
14 10 Liu X, Kakade M, Fuller CJ, *et al.* Depression after exposure to stressful events:  
15  
16 lessons learned from the severe acute respiratory syndrome epidemic. *Compr*  
17  
18 *Psychiatry* 2012;**53**. doi:10.1016/j.comppsy.2011.02.003  
19  
20  
21 11 Maunder RG, Lancee WJ, Balderson KE, *et al.* Long-term psychological and  
22  
23 occupational effects of providing hospital healthcare during SARS outbreak. *Emerging*  
24  
25 *Infect Dis* 2006;**12**:1924–32. doi:10.3201/eid1212.060584  
26  
27  
28 12 Bakker AB, Van Veldhoven M, Xanthopoulou D. Beyond the demand-control model. *J*  
29  
30 *Pers Psychol* 2010;**9**:3–16. doi:10.1027/1866-5888/a000006  
31  
32  
33 13 Karasek RA. Job demands, job decision latitude, and mental strain: Implications for job  
34  
35 redesign. *Adm Sci Q* 1979;**24**:285–  
36  
37 308. [https://www.jstor.org/stable/pdf/2392498.pdf?casa\\_token=Lv7e61ddZFkAAAAA:](https://www.jstor.org/stable/pdf/2392498.pdf?casa_token=Lv7e61ddZFkAAAAA:cDIPyGRTkgjcINSmVIIVUYGHt0E2srz5VXhjI3ak28KDkdFVZRDUx-g9yeZF8Vm3XAAAdRPJQ5z3Mh-opCYGqlqZIK-GjAajHupaW4G1TQUayGhs9IIua)  
38  
39 [cDIPyGRTkgjcINSmVIIVUYGHt0E2srz5VXhjI3ak28KDkdFVZRDUx-](https://www.jstor.org/stable/pdf/2392498.pdf?casa_token=Lv7e61ddZFkAAAAA:cDIPyGRTkgjcINSmVIIVUYGHt0E2srz5VXhjI3ak28KDkdFVZRDUx-g9yeZF8Vm3XAAAdRPJQ5z3Mh-opCYGqlqZIK-GjAajHupaW4G1TQUayGhs9IIua)  
40  
41 [g9yeZF8Vm3XAAAdRPJQ5z3Mh-opCYGqlqZIK-GjAajHupaW4G1TQUayGhs9IIua](https://www.jstor.org/stable/pdf/2392498.pdf?casa_token=Lv7e61ddZFkAAAAA:cDIPyGRTkgjcINSmVIIVUYGHt0E2srz5VXhjI3ak28KDkdFVZRDUx-g9yeZF8Vm3XAAAdRPJQ5z3Mh-opCYGqlqZIK-GjAajHupaW4G1TQUayGhs9IIua)  
42  
43 (accessed 15 Feb 2021).  
44  
45  
46 14 De Lange AH, Taris TW, Kompier MAJ, *et al.* The very best of the millennium:  
47  
48 longitudinal research and the Demand-Control-(Support) Model. *J Occup Health*  
49  
50 *Psychol* 2003;**8**:282–305. doi:10.1037/1076-8998.8.4.282  
51  
52  
53 15 De Cuyper N, Sulea C, Philippaers K, *et al.* Perceived employability and performance:  
54  
55 moderation by felt job insecurity. *Pers Rev* 2014;**43**:536–52. doi:10.1108/PR-03-2013-  
56  
57 0050  
58  
59  
60

- 1  
2  
3 16 Kirves K, Kinnunen U, De Cuyper N, *et al.* Trajectories of perceived employability  
4 and their associations with well-being at work. *J Pers Psychol* 2014;**13**:46–57.  
5  
6 doi:10.1027/1866-5888/a000103  
7  
8  
9  
10 17 Akkermans J, Seibert SE, Mol ST. Tales of the unexpected. Integrating career shocks  
11 in the contemporary career literature. *SA J Ind Psychol* 2018;**44**:1–10.  
12  
13 doi:10.4102/sajip.v44i0.1503  
14  
15  
16 18 Akkermans J, Richardson J, Kraimer ML. The Covid-19 crisis as a career shock:  
17 Implications for careers and vocational behavior. *J Vocat Behav* 2020;**119**:1–5.  
18  
19 doi:10.1016/J.JVB.2020.103434  
20  
21  
22  
23 19 Wallace JE, Lemaire JB, Ghali WA. Physician wellness: A missing quality indicator.  
24 *Lancet* 2009;**374**:1714–21. doi:10.1016/S0140-6736(09)61424-0  
25  
26  
27  
28 20 Maunder R. The experience of the 2003 SARS outbreak as a traumatic stress among  
29 frontline healthcare workers in Toronto: lessons learned. *Philos Trans R Soc London*  
30  
31 2004;**359**:1117–25. doi:10.1098/rstb.2004.1483  
32  
33  
34  
35 21 Naushad VA, Bierens JJ, Nishan KP, *et al.* A systematic review of the impact of  
36 disaster on the mental health of medical responders. *Prehosp Disaster Med*  
37  
38 2019;**34**:632–43. doi:10.1017/S1049023X19004874  
39  
40  
41  
42 22 Willan J, King AJ, Jeffery K, *et al.* Challenges for NHS hospitals during Covid-19  
43 epidemic. *BMJ* 2020;**368**:1–2. doi:10.1136/bmj.m1117  
44  
45  
46  
47 23 Tan, B. Y., Chew, N. W., Lee, G. K., Jing, M., Goh, Y., Yeo, L. L., ... & Shanmugam  
48 GN. Psychological impact of the Covid-19 pandemic on health care workers in  
49 Singapore. *Ann Intern Med* 2020;:1–3. doi:10.7326/M20-1083  
50  
51  
52  
53 24 Chong MY, Wang WC, Hsieh WC, *et al.* Psychological impact of severe acute  
54 respiratory syndrome on health workers in a tertiary hospital. *Br J Psychiatry*  
55  
56 2004;**185**:127–33.  
57  
58  
59  
60

- 1  
2  
3 25 Preti E, Di Mattei V, Perego G, *et al.* The psychological impact of epidemic and  
4  
5 pandemic outbreaks on healthcare workers: rapid review of the evidence. *Curr*  
6  
7 *Psychiatry Rep* 2020;**22**:1–22. doi:10.1007/s11920-020-01166-z  
8  
9
- 10 26 Schwarz N. Retrospective and concurrent self-reports: The rationale for real-time data  
11  
12 capture. In: Stone A, Shiffman SS, Atienza A, *et al.*, eds. *The science of real-time data*  
13  
14 *capture: Self-reports in health research*. New York: : Oxford University Press 2007.  
15  
16 11–26. [https://dornsife.usc.edu/assets/sites/780/docs/schwarz\\_retrospective\\_self-](https://dornsife.usc.edu/assets/sites/780/docs/schwarz_retrospective_self-reports_mdc_2007.pdf)  
17  
18 [reports\\_mdc\\_2007.pdf](https://dornsife.usc.edu/assets/sites/780/docs/schwarz_retrospective_self-reports_mdc_2007.pdf)  
19  
20
- 21 27 Van Leeuwen, E. H., Knies, E., Van Rensen, E. L. J., Taris TW. Stimulating perceived  
22  
23 ability and willingness to continue working and job crafting behaviour of physicians:  
24  
25 An intervention study. In: *Dutch HRM Network Conference*. Tilburg: 2019.  
26  
27
- 28 28 Blank, J. L. T., Niaounakis TK. Productiviteitsontwikkelingen bij medisch specialisten:  
29  
30 Resultaten en technische rapportage. Delft: 2019.  
31  
32
- 33 29 Van Veldhoven, M., Prins, J., Van der Laken, P., Dijkstra L. *VBBA 2.0: Update van de*  
34  
35 *standaard voor vragenlijstonderzoek naar werk, welbevinden en prestaties*. Enschede: :  
36  
37 Gildeprint 2014.  
38  
39
- 40 30 Demerouti E, Le Blanc PM, Bakker AB, *et al.* Present but sick: a three-wave study on  
41  
42 job demands, presenteeism and burnout. *Career Dev Int* 2009;**14**:50–68.  
43  
44 doi:10.1108/13620430910933574  
45  
46
- 47 31 Morgeson FP, Humphrey SE. The work design questionnaire (WDQ): Developing and  
48  
49 validating a comprehensive measure for assessing job design and the nature of work. *J*  
50  
51 *Appl Psychol* 2006;**91**:1321–39. doi:10.1037/0021-9010.91.6.1321  
52  
53
- 54 32 Oude Hengel KM, Blatter BM, Geuskens GA, *et al.* Factors associated with the ability  
55  
56 and willingness to continue working until the age of 65 in construction workers. *Int*  
57  
58 *Arch Occup Environ Health* 2012;**85**:783–90. doi:10.1007/s00420-011-0719-3  
59  
60



- 1  
2  
3 33 Wanous JP, Reichers AE, Hudy MJ. Overall job satisfaction: How good are single-item  
4 measures? *J Appl Psychol* 1997;**82**:247–52. doi:10.1037/0021-9010.82.2.247  
5  
6  
7  
8 34 Martins LL, Eddleston KA, Veiga JF. Moderators of the relationship between work-  
9 family conflict and career satisfaction. *Acad Manag J* 2002;**45**:399–409.  
10  
11  
12 doi:10.5465/3069354  
13  
14  
15 35 Van Dooren W, Noordegraaf M. Staging science: Authoritativeness and fragility of  
16 models and measurement in the Covid-19 crisis. *Public Adm Rev* 2020;**80**:610–5.  
17  
18  
19 doi:10.1111/puar.13219  
20  
21  
22 36 Bernburg M, Vitzthum K, Groneberg DA, *et al.* Physicians' occupational stress,  
23 depressive symptoms and work ability in relation to their working environment: a  
24 cross-sectional study of differences among medical residents with various specialties  
25 working in German hospitals. *BMJ Open* 2016;**6**:1–9. doi:10.1136/BMJOPEN-2016-  
26  
27  
28  
29  
30  
31  
32  
33  
34  
35  
36  
37  
38  
39  
40  
41  
42  
43  
44  
45  
46  
47  
48  
49  
50  
51  
52  
53  
54  
55  
56  
57  
58  
59  
60
- 37 37 Fowler A, Abbott TEF, Pearse RM. Can we safely continue to offer surgical treatments  
during the COVID-19 pandemic? *BMJ Qual Saf* Published Online First: 20 November  
2020. doi:10.1136/BMJQS-2020-012544
- 38 38 Elhadi M, Msherghi A, Elgzairi M, *et al.* Psychological status of healthcare workers  
during the civil war and COVID-19 pandemic: A cross-sectional study. *J Psychosom  
Res* 2020;**137**:1–6. doi:10.1016/j.jpsychores.2020.110221
- 39 39 Luo M, Guo L, Yu M, *et al.* The psychological and mental impact of coronavirus  
disease 2019 (COVID-19) on medical staff and general public - A systematic review  
and meta-analysis. *Psychiatry Res* 2020;**291**:1–9. doi:10.1016/j.psychres.2020.113190

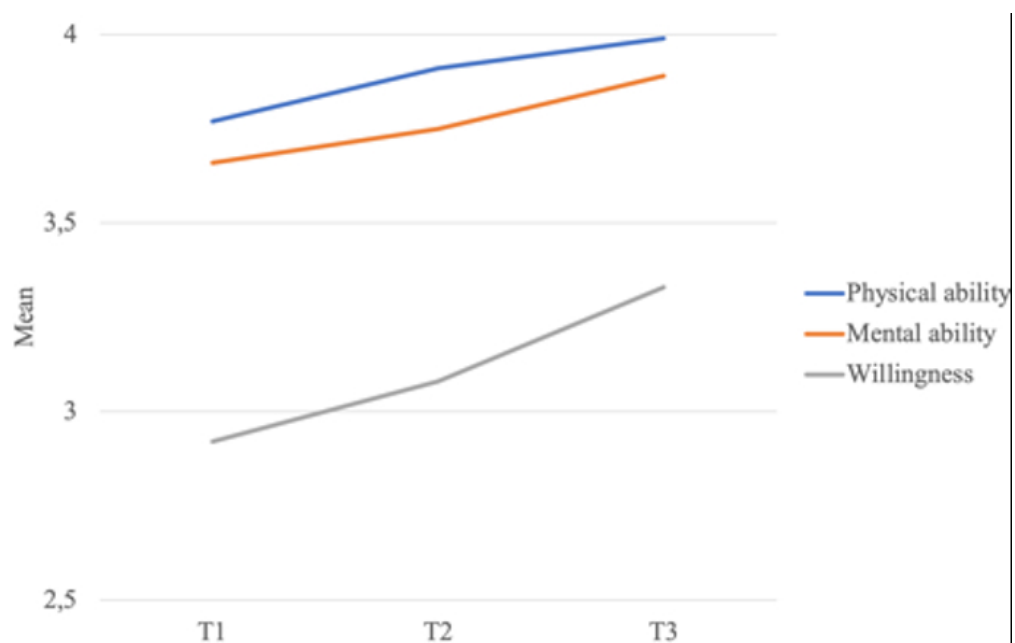

1  
2  
3  
4  
5  
6  
7  
8  
9  
10  
11  
12  
13  
14  
15  
16  
17  
18  
19  
20  
21  
22  
23  
24  
25  
26  
27  
28  
29  
30  
31  
32  
33  
34  
35  
36  
37  
38  
39  
40  
41  
42  
43  
44  
45  
46  
47  
48  
49  
50  
51  
52  
53  
54  
55  
56  
57  
58  
59  
60

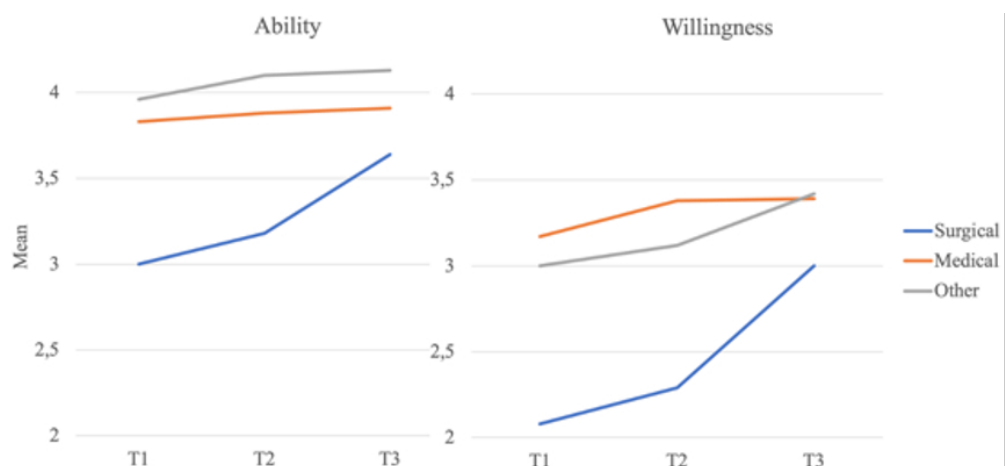

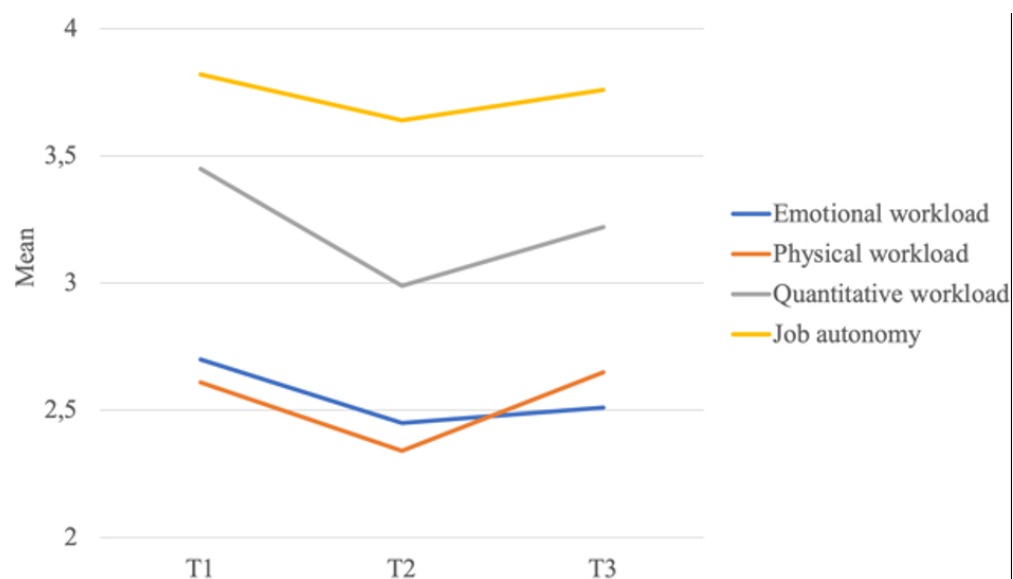

1  
2  
3  
4  
5  
6  
7  
8  
9  
10  
11  
12  
13  
14  
15  
16  
17  
18  
19  
20  
21  
22  
23  
24  
25  
26  
27  
28  
29  
30  
31  
32  
33  
34  
35  
36  
37  
38  
39  
40  
41  
42  
43  
44  
45  
46  
47  
48  
49  
50  
51  
52  
53  
54  
55  
56  
57  
58  
59  
60

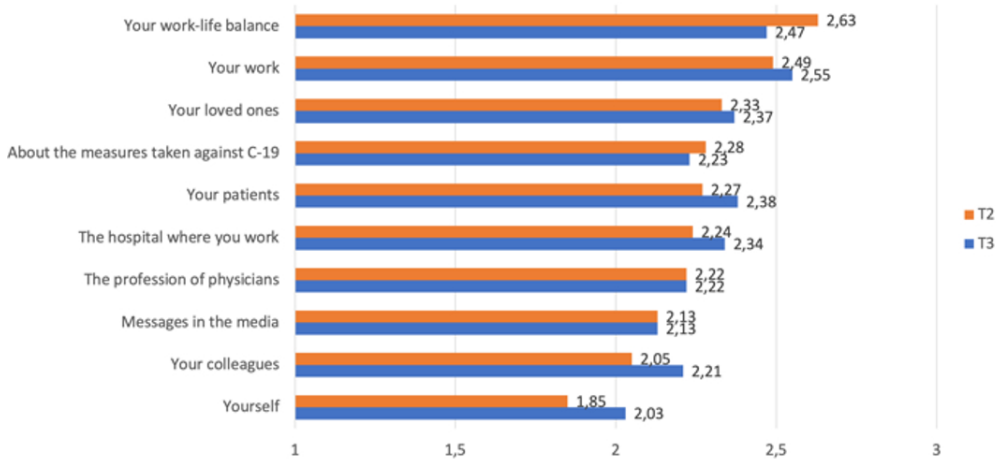

STROBE Statement—Checklist of items that should be included in reports of *cohort studies*

|                           | Item No | Recommendation                                                                                                                                                                                                                                                                                                                                                                                                                           |
|---------------------------|---------|------------------------------------------------------------------------------------------------------------------------------------------------------------------------------------------------------------------------------------------------------------------------------------------------------------------------------------------------------------------------------------------------------------------------------------------|
| <b>Title and abstract</b> | 1       | (a) Indicate the study's design with a commonly used term in the title or the abstract<br>(b) Provide in the abstract an informative and balanced summary of what was done and what was found                                                                                                                                                                                                                                            |
| <b>Introduction</b>       |         |                                                                                                                                                                                                                                                                                                                                                                                                                                          |
| Background/rationale      | 2       | Explain the scientific background and rationale for the investigation being reported                                                                                                                                                                                                                                                                                                                                                     |
| Objectives                | 3       | State specific objectives, including any prespecified hypotheses                                                                                                                                                                                                                                                                                                                                                                         |
| <b>Methods</b>            |         |                                                                                                                                                                                                                                                                                                                                                                                                                                          |
| Study design              | 4       | Present key elements of study design early in the paper                                                                                                                                                                                                                                                                                                                                                                                  |
| Setting                   | 5       | Describe the setting, locations, and relevant dates, including periods of recruitment, exposure, follow-up, and data collection                                                                                                                                                                                                                                                                                                          |
| Participants              | 6       | (a) Give the eligibility criteria, and the sources and methods of selection of participants. Describe methods of follow-up<br>(b) For matched studies, give matching criteria and number of exposed and unexposed (NA)                                                                                                                                                                                                                   |
| Variables                 | 7       | Clearly define all outcomes, exposures, predictors, potential confounders, and effect modifiers. Give diagnostic criteria, if applicable (NA)                                                                                                                                                                                                                                                                                            |
| Data sources/measurement  | 8*      | For each variable of interest, give sources of data and details of methods of assessment (measurement). Describe comparability of assessment methods if there is more than one group                                                                                                                                                                                                                                                     |
| Bias                      | 9       | Describe any efforts to address potential sources of bias                                                                                                                                                                                                                                                                                                                                                                                |
| Study size                | 10      | Explain how the study size was arrived at                                                                                                                                                                                                                                                                                                                                                                                                |
| Quantitative variables    | 11      | Explain how quantitative variables were handled in the analyses. If applicable, describe which groupings were chosen and why                                                                                                                                                                                                                                                                                                             |
| Statistical methods       | 12      | (a) Describe all statistical methods, including those used to control for confounding<br>(b) Describe any methods used to examine subgroups and interactions<br>(c) Explain how missing data were addressed<br>(d) If applicable, explain how loss to follow-up was addressed<br>(e) Describe any sensitivity analyses                                                                                                                   |
| <b>Results</b>            |         |                                                                                                                                                                                                                                                                                                                                                                                                                                          |
| Participants              | 13*     | (a) Report numbers of individuals at each stage of study—eg numbers potentially eligible, examined for eligibility, confirmed eligible, included in the study, completing follow-up, and analysed<br>(b) Give reasons for non-participation at each stage<br>(c) Consider use of a flow diagram (not included yet, could still be included but I think it is clear from the text and I am not sure whether it increases the readability) |
| Descriptive data          | 14*     | (a) Give characteristics of study participants (eg demographic, clinical, social) and information on exposures and potential confounders<br>(b) Indicate number of participants with missing data for each variable of interest<br>(c) Summarise follow-up time (eg, average and total amount)                                                                                                                                           |
| Outcome data              | 15*     | Report numbers of outcome events or summary measures over time                                                                                                                                                                                                                                                                                                                                                                           |
| Main results              | 16      | (a) Give unadjusted estimates and, if applicable, confounder-adjusted estimates and their precision (eg, 95% confidence interval). Make clear which confounders were adjusted for and why they were included<br>(b) Report category boundaries when continuous variables were categorized<br>(c) If relevant, consider translating estimates of relative risk into absolute risk for a                                                   |

|    |                          |    |                                                                                        |
|----|--------------------------|----|----------------------------------------------------------------------------------------|
| 1  |                          |    | meaningful time period                                                                 |
| 2  | Other analyses           | 17 | Report other analyses done—eg analyses of subgroups and interactions, and              |
| 3  |                          |    | sensitivity analyses                                                                   |
| 4  |                          |    |                                                                                        |
| 5  | <b>Discussion</b>        |    |                                                                                        |
| 6  | Key results              | 18 | Summarise key results with reference to study objectives                               |
| 7  | Limitations              | 19 | Discuss limitations of the study, taking into account sources of potential bias or     |
| 8  |                          |    | imprecision. Discuss both direction and magnitude of any potential bias                |
| 9  | Interpretation           | 20 | Give a cautious overall interpretation of results considering objectives, limitations, |
| 10 |                          |    | multiplicity of analyses, results from similar studies, and other relevant evidence    |
| 11 | Generalisability         | 21 | Discuss the generalisability (external validity) of the study results                  |
| 12 |                          |    |                                                                                        |
| 13 | <b>Other information</b> |    |                                                                                        |
| 14 | Funding                  | 22 | Give the source of funding and the role of the funders for the present study and, if   |
| 15 |                          |    | applicable, for the original study on which the present article is based               |
| 16 |                          |    |                                                                                        |
| 17 |                          |    |                                                                                        |

\*Give information separately for exposed and unexposed groups.

**Note:** An Explanation and Elaboration article discusses each checklist item and gives methodological background and published examples of transparent reporting. The STROBE checklist is best used in conjunction with this article (freely available on the Web sites of PLoS Medicine at <http://www.plosmedicine.org/>, Annals of Internal Medicine at <http://www.annals.org/>, and Epidemiology at <http://www.epidem.com/>). Information on the STROBE Initiative is available at <http://www.strobe-statement.org>.

# BMJ Open

## A positive impact of the Covid-19 pandemic? A longitudinal study on the impact of the Covid-19 pandemic on physicians' work experiences and employability

|                                 |                                                                                                                                                                                                                                                                                                                              |
|---------------------------------|------------------------------------------------------------------------------------------------------------------------------------------------------------------------------------------------------------------------------------------------------------------------------------------------------------------------------|
| Journal:                        | <i>BMJ Open</i>                                                                                                                                                                                                                                                                                                              |
| Manuscript ID                   | bmjopen-2021-050962.R1                                                                                                                                                                                                                                                                                                       |
| Article Type:                   | Original research                                                                                                                                                                                                                                                                                                            |
| Date Submitted by the Author:   | 24-Jul-2021                                                                                                                                                                                                                                                                                                                  |
| Complete List of Authors:       | Leeuwen, Evelien; UMC Utrecht; Utrecht University School of Governance<br>Taris, Toon; Utrecht University, Social, Health and Organizational Psychology<br>van Rensen, Elizabeth; UMC Utrecht<br>Knies, Eva; Utrecht University School of Governance<br>Lammers, Jan-Willem; UMC Utrecht, Department of Respiratory Medicine |
| <b>Primary Subject Heading</b>: | Mental health                                                                                                                                                                                                                                                                                                                |
| Secondary Subject Heading:      | Mental health                                                                                                                                                                                                                                                                                                                |
| Keywords:                       | COVID-19, Human resource management < HEALTH SERVICES ADMINISTRATION & MANAGEMENT, MENTAL HEALTH                                                                                                                                                                                                                             |
|                                 |                                                                                                                                                                                                                                                                                                                              |

SCHOLARONE™  
Manuscripts





I, the Submitting Author has the right to grant and does grant on behalf of all authors of the Work (as defined in the below author licence), an exclusive licence and/or a non-exclusive licence for contributions from authors who are: i) UK Crown employees; ii) where BMJ has agreed a CC-BY licence shall apply, and/or iii) in accordance with the terms applicable for US Federal Government officers or employees acting as part of their official duties; on a worldwide, perpetual, irrevocable, royalty-free basis to BMJ Publishing Group Ltd ("BMJ") its licensees and where the relevant Journal is co-owned by BMJ to the co-owners of the Journal, to publish the Work in this journal and any other BMJ products and to exploit all rights, as set out in our [licence](#).

The Submitting Author accepts and understands that any supply made under these terms is made by BMJ to the Submitting Author unless you are acting as an employee on behalf of your employer or a postgraduate student of an affiliated institution which is paying any applicable article publishing charge ("APC") for Open Access articles. Where the Submitting Author wishes to make the Work available on an Open Access basis (and intends to pay the relevant APC), the terms of reuse of such Open Access shall be governed by a Creative Commons licence – details of these licences and which [Creative Commons](#) licence will apply to this Work are set out in our licence referred to above.

Other than as permitted in any relevant BMJ Author's Self Archiving Policies, I confirm this Work has not been accepted for publication elsewhere, is not being considered for publication elsewhere and does not duplicate material already published. I confirm all authors consent to publication of this Work and authorise the granting of this licence.

1  
2  
3 **Title: A positive impact of the Covid-19 pandemic? A longitudinal study on the impact of the**  
4 **Covid-19 pandemic on physicians' work experiences and employability**  
5  
6  
7  
8

9 Evelien H. van Leeuwen, MSc (corresponding author)

10 University Medical Center Utrecht, Heidelberglaan 100, 3584 CX Utrecht, the Netherlands

11  
12  
13 Tel. +31 (0)30-253 81 01

14  
15  
16 [e.h.vanleeuwen@umcutrecht.nl](mailto:e.h.vanleeuwen@umcutrecht.nl)  
17  
18

19  
20 Prof. dr. Toon W. Taris

21  
22 Utrecht University Social Sciences, Heidelberglaan 1, 3584 CS Utrecht, the Netherlands

23  
24 [a.w.taris@uu.nl](mailto:a.w.taris@uu.nl)  
25  
26  
27

28 Dr. Elizabeth L. J. van Rensen

29  
30 University Medical Center Utrecht, Heidelberglaan 100, 3584 CX Utrecht, the Netherlands

31  
32 [e.l.j.vanrensen@umcutrecht.nl](mailto:e.l.j.vanrensen@umcutrecht.nl)  
33  
34  
35

36 Prof. dr. Eva Knies

37  
38 Utrecht University School of Governance, Bijlhouwerstraat 6, 3511 ZC Utrecht, the Netherlands

39  
40 [e.knies@uu.nl](mailto:e.knies@uu.nl)  
41  
42  
43  
44

45 Prof. Dr. Jan-Willem J. Lammers

46  
47 University Medical Center Utrecht, Heidelberglaan 100, 3584 CX Utrecht, the Netherlands

48  
49 [Jlammers026@gmail.com](mailto:Jlammers026@gmail.com)  
50  
51  
52  
53  
54  
55  
56  
57  
58  
59  
60

## Abstract

**Objective** – The Covid-19 pandemic places an enormous demand on physicians around the world.

The aim of this study was to examine the impact of the Covid-19 pandemic on physicians' work experiences and their ability and willingness to continue working in their profession until retirement (i.e. their employability).

**Design** - A longitudinal comparative design was used. Survey data were collected on three moments: before (May 2019), in the early phase (May 2020) and in a later phase (November 2020) of the Covid-19 pandemic. Time effects were tested using repeated-measures analyses of variance (RM ANOVA) and one-way analyses of variance (one-way ANOVA).

**Setting** – This study took place among physicians of two hospitals in a large city in the Netherlands.

**Participants** – 165 hospital physicians with surgical, medical and other specialties participated in this study.

**Results** – Physicians' employability significantly increased from the time prior to the Covid-19 pandemic, compared to the period during this pandemic. Employability differs among physicians with surgical, medical and other specialties. Furthermore, physicians experienced a lower emotional, physical and quantitative workload during the first peak of the Covid-19 pandemic, compared to before the pandemic. Moreover, physicians experienced the most stress from the impact of Covid-19 on their work in general and from combining work and private life.

**Conclusions** – This study shows that physicians' employability and work experiences are affected by the Covid-19 pandemic. Work experiences vary for physicians with different specialties. These varieties stress the importance of attention for physicians' individual needs and challenges regarding working during the Covid-19 pandemic, and the possibility of continuing work in the aftermath of this crisis. Based on this, physicians can be offered tailor-made solutions. This is important to maintain a healthy and employable workforce which is essential for a sustainable health care system.

### Strengths and limitations of this study

- The study captured the work experiences of physicians prior to and during the Covid-19 pandemic, allowing for within-person comparisons

- The study used a longitudinal study approach with data collected at three moments in time
- Despite the highly relevant longitudinal study approach, this has also resulted in participants dropout

## Introduction

Health care workers stand in the frontline of health care pandemics [1]. They are highly vulnerable during these pandemics, given the risk of exposure to the virus, concerns about infecting their loved ones, shortages of personal protective equipment, extended workload, and involvement in emotional and ethical decision making [2,3,4]. The Covid-19 pandemic is likely to have implications for health care workers' ability and willingness to work in the short-run and to continue their essential work on the frontlines in the long-run [5]. Evidence from earlier studies on the impact of the Covid-19 pandemic on health care workers, including meta-analyses and systematic reviews, show that the Covid-19 pandemic results in stress [6], illness, insomnia [1,7], fear for becoming infected [8], hesitation to work [9] or a lack of motivation to work [10] in the short-run. From previous research on crises we know that a pandemic may even result in more adverse consequences for physicians in the long-run, such as developing burn-out, psychological distress, and post-traumatic stress-disorder [11,12].

The possible consequences of crises for physicians make it important to monitor physicians' work experiences (i.e. their perceived workload, job autonomy and stress) and their ability and willingness to continue working in their profession (i.e. employability). It is important to prevent adverse consequences, because health care workers' well-being might be at stake. Studying physicians' work experiences helps to monitor their ability to work in the short-term. Especially job demands (such as workload) and job resources (such as job autonomy) have been shown to be important factors that affect well-being, stress and performance [13–15]. Furthermore, employability provides an indication of physicians' ability and willingness to continue working in their profession. Research has shown that employability positively affects well-being and performance [16,17]. Research has shown that crises, such as the Covid-19 pandemic, are so-called “career shocks” referring to disruptive and extraordinary

1  
2  
3 events caused by factors outside an individual's control, triggering a deliberate thought process  
4 concerning ones' career [18]. This may result in people reconsidering their position, leaving their  
5 profession or lower job or career satisfaction [19]. This challenges their employability, which is  
6 especially problematic in a health crisis as employable physicians are needed to handle the high  
7 demands for health care, and in the aftermath of the health crisis due to delayed operations and other  
8 treatments for instance.  
9  
10  
11  
12  
13  
14  
15  
16  
17

18 In this study we examine the impact of the Covid-19 pandemic on physicians' work experiences and  
19 employability, by addressing the following research question in the context of a three-wave  
20 prospective study: "What is the impact of the Covid-19 pandemic on physicians' work experiences  
21 (i.e. perceived workload, job autonomy and stress) and their ability and willingness to continue  
22 working in their profession (i.e. employability)?" Understanding the impact of the Covid-19 pandemic  
23 on physicians' work is important to be prepared for future outbreaks of health crises, as maintaining a  
24 healthy and employable workforce is essential for a sustainable health care system. These themes, and  
25 topics related to this, have to date received little attention, especially in a medical setting. Physicians  
26 tend to self-ignore attention for their well-being and health systems poorly support this [20],  
27 emphasizing the importance of this research.  
28  
29  
30  
31  
32  
33  
34  
35  
36  
37  
38  
39  
40

41 This study examines the impact of the Covid-19 pandemic on physicians with varying specialties.  
42 Previous studies have found mixed outcomes for the impact of the Covid-19 pandemic on health care  
43 workers working in different departments [21,22,23]. Some studies have shown that the impact of  
44 pandemics varies for health care workers working in different departments [22,23]. For instance, one  
45 study found that those who work in emergency departments, intensive care units, and isolation wards  
46 have a greater risk of developing adverse psychiatric outcomes than those working in other  
47 departments [22]. Another study found the opposite, physicians and nurses who worked in the  
48 frontline had a lower frequency of burn-out and were less worried about being infected with the  
49 Covid-19 virus compared to those working in usual wards [23]. Yet another study found no  
50 differences in mental health outcomes for physicians and nurses working in Covid-19 care units, non  
51  
52  
53  
54  
55  
56  
57  
58  
59  
60

1  
2  
3 Covid-19 care units or in both units [24]. Despite possible differences between physicians working in  
4 different departments, it is likely that pandemics, such as the Covid-19 pandemic, affects them all to  
5 some extent as their work has suddenly changed, both in terms of content (e.g. change in cases,  
6 increase in the use of video consults) and location (e.g. working from home or in different  
7 departments), and due to an uncertain future. These changes may result in various job demands such  
8 as a high (emotional) workload or stress [1,25] which may vary between groups of physicians. More  
9 research is needed to understand the impact of pandemics on physicians with different specialties. This  
10 study examines physicians with surgical, medical, and other specialties to examine the impact on their  
11 work and possible differences between specialties.  
12  
13  
14  
15  
16  
17  
18  
19  
20  
21  
22  
23

24 Studies examining the psychological effects of pandemics (e.g. SARS, H1N1 influenza and avian  
25 influenza H5N1), including recent studies into the Covid-19 pandemic, often use cross-sectional  
26 methods [7,10–12,26]. A disadvantage of this approach is that it cannot capture the dynamics of  
27 pandemics. The impact of pandemics on health care workers has been shown to vary in different  
28 phases of the pandemic. During the initial outbreak health care workers perceive feelings of extreme  
29 vulnerability, uncertainty, anxiety and threat while mental health problems such as depression are  
30 more likely to develop in a later phase [27]. For this reason, a longitudinal approach where  
31 experiences are measured at multiple points in time is more appropriate to study the impact of a  
32 pandemic. In this study we use a longitudinal approach by examining physicians experiences at three  
33 moments in time.  
34  
35  
36  
37  
38  
39  
40  
41  
42  
43  
44

45 In addition, a meta-analysis shows that these studies often use retrospective questions where  
46 respondents are asked for their past experiences [28]. This approach is problematic as psychologists  
47 and survey methodologists have shown that subjective experiences are poorly represented in memory.  
48 Retrospective questions often ask respondents for information that they cannot provide with any  
49 validity [29]. Therefore, examining behaviour and experiences by using real-time data is highly  
50 preferable [29]. This is done in this study by asking for physicians' current behaviour, at the three  
51 moments of taking the surveys.  
52  
53  
54  
55  
56  
57  
58  
59  
60

1  
2  
3 Based on prior studies into the impact of health crises on health care workers, together with  
4  
5 early evidence on the impact of the Covid-19 pandemic on health care workers, we expect that  
6  
7 physicians experience their work more negatively during the Covid-19 pandemic compared to the  
8  
9 situation prior to this pandemic, which will be reflected in a higher emotional, physical and  
10  
11 quantitative workload. Furthermore, we expect that physicians are more negative about their  
12  
13 employability during the pandemic, compared to the situation prior to the Covid-19 pandemic, and  
14  
15 have a lower job and career satisfaction during the pandemic compared to the time prior to the  
16  
17 pandemic.  
18  
19  
20  
21

## 22 Method

23  
24 Three surveys were sent to physicians in two hospitals in a large Dutch city, an academic hospital and  
25  
26 a general hospital. The first survey was sent as part of another study [30]. The sample size of this  
27  
28 study was therefore predetermined by the sample of the prior study that was calculated according to a  
29  
30 power analysis. The first survey was sent in May 2019 (T1), prior to the Covid-19 outbreak. A second  
31  
32 survey was sent in May 2020, in an early phase of the Covid-19 pandemic. This was one month after  
33  
34 the first peak of Covid-19 infections in the Netherlands [31]. At this time, both hospitals had  
35  
36 established a Covid-19 clinic and an Covid-19 intensive care unit which were separated from other  
37  
38 departments in the hospital. Furthermore, in both hospitals non-emergent care and surgeries were  
39  
40 postponed. Physicians and health care workers from different departments were requested to support  
41  
42 on the Covid-19 departments. Health care professionals were supported with volunteers from  
43  
44 “outside” who were not employed by the hospitals. The long period in which the Covid-19 pandemic  
45  
46 dominates the world, made it relevant to add a study wave in a later phase of the pandemic to examine  
47  
48 its longer-term consequences. Therefore, a third survey was sent in November 2020 (T3), one month  
49  
50 after the second peak of Covid-19 in the Netherlands. During the first and second peak of the number  
51  
52 of Covid-19 infections, there were 60 patients infected with the Covid-19 virus in the academic  
53  
54 hospital (20 on the intensive care and 40 in the Covid-19 clinic) and 30 in the general hospital (8 on  
55  
56 the intensive care and 22 in the Covid-19 clinic). When the surveys were sent at T2 and T3, many  
57  
58 countries, including the Netherlands, were partly or fully in lockdown, social distancing was required  
59  
60

1  
2  
3 and the number of patients infected with Covid-19 was high. In the two hospitals where this study  
4 took place, waiting lists for patients were higher at T3 than at T2 due to non-emergent care that was  
5 still being postponed.  
6  
7  
8  
9

10 Participants were recruited through promotional presentations and through an internal mailing list.  
11  
12 Participants provided informed consent at the start of each survey stating that participation is  
13 voluntary, outcomes are held confidential, participants can withdraw from the study at any time, and  
14 all study material was anonymized and saved on a protected server. 165 physicians participated in this  
15 study at T1. These 165 physicians were invited by e-mail to complete a second and a third survey. 93  
16 physicians completed the survey at T2 (response rate: 56%), and 75 physicians completed all three  
17 surveys (response rate: 45%). A flowchart of the participants in this study is presented in figure 1. We  
18 compared participants who completed all three surveys (T1, T2 and T3) ( $n=75$ ) with participants who  
19 only completed the survey sent at T1 ( $n=72$ ). Multivariate analysis of variance indicated that there  
20 were no significant differences between these participants in terms of age ( $F(1,124)=0.037, p=0.849$ ),  
21 hours worked according to contract ( $F(1,135)=0.555, p=0.458$ ), occupational tenure ( $F(1,133)=0.591,$   
22  $p=0.443$ ), and organisational tenure ( $F(1,129)=0.804, p=0.371$ ). For the dichotomous variables gender,  
23 hospital type (general vs. academic), type of specialism (surgical, medical vs. other, following the  
24 categorization of [32]) and type of employment contract (employed by the hospital vs. independently  
25 established) we conducted chi-square tests, again showing that there were no significant differences  
26 between participants who dropped out of this study and the participants who completed all three  
27 surveys (all  $p$ 's  $> 0.452$ ).  
28  
29  
30  
31  
32  
33  
34  
35  
36  
37  
38  
39  
40  
41  
42  
43  
44  
45  
46  
47

48 **Please insert: Figure 1: Flow chart of participants at T1, T2 and T3**  
49  
50  
51

52 Physicians provided several reasons for not completing the surveys sent at T2 and/or T3. At T2, 1  
53 physician had left the hospital, and 10 physicians were on leave (either a pregnancy leave, holiday  
54 leave or were abroad). At T3, 2 physicians had left the hospital, 10 physicians were on leave, and 1  
55 physician was “too busy” to complete the survey. These reasons, apart from the latter, are unlikely to  
56  
57  
58  
59  
60



1  
2  
3 result in biased outcomes. This, together with the non-significant results for the non-response analysis,  
4  
5 show that there are no significant differences between the participants who dropped out of this study  
6  
7 and the participants who completed all three surveys. The result section reports on the results of the  
8  
9 analyses based on the data from participants who completed the surveys on T1, T2 and T3 ( $n=75$ ).  
10  
11

12  
13 The questions addressed sociodemographic characteristics (gender, age), job characteristics  
14  
15 (specialism, autonomy, workload, occupational tenure referring to the time working as a medical  
16  
17 specialist and organizational tenure referring to the time working in their current hospital) and  
18  
19 involvement with care for patients with the Covid-19 virus. Further, physicians were asked to rate  
20  
21 their emotional workload (5 items: *“Is your job emotionally demanding?”*, *“Are you confronted in*  
22  
23 *your work with things that affect you personally?”*, *“Are you in your work in contact with difficult*  
24  
25 *patients or their relatives?”*, *“Do you have to convince or persuade people for your job?”* and *“Do*  
26  
27 *you encounter emotionally demanding events in your work?”*,  $\alpha_{T1}=0.96$ ;  $\alpha_{T2}=0.82$ ;  $\alpha_{T3}=0.82$ , [33]),  
28  
29 quantitative workload (3 items: *“Do you have too much work to do?”*, *“Do you have to put in extra*  
30  
31 *effort to finish your work?”* and *“Do you have to hurry?”*,  $\alpha_{T1}=0.90$ ;  $\alpha_{T2}=0.91$ ;  $\alpha_{T3}=0.93$ , [33]),  
32  
33 physical workload (1 item: *“My job is physically demanding”*, [34]), and job autonomy (3 items: *“The*  
34  
35 *job allows me to decide on my own how to go about doing my work”*, *“The job provides me with*  
36  
37 *significant autonomy in making decisions”* and *“The job gives me a chance to use my personal*  
38  
39 *initiative or judgment in carrying out the work”*,  $\alpha_{T1}=0.80$ ;  $\alpha_{T2}=0.72$ ;  $\alpha_{T3}=0.79$ , [35]). Answers were  
40  
41 given on a 5-point Likert scale (1=never, 5=very often).  
42  
43  
44  
45  
46  
47

48 Other questions asked for physicians' perceptions of their own employability (2 items measured  
49  
50 ability: *“I am [physically (item 1)/ mentally (item 2)] able to continue to work until the age of 67 in*  
51  
52 *my current profession”*; 1 item measured willingness: *“I am willing to continue to work until the age*  
53  
54 *of 67 in my current profession”*, [36]), job satisfaction (1 item: *“Generally speaking, I am very*  
55  
56 *satisfied with my job”* [37]), and career satisfaction (1 item: *“Generally speaking, I am very satisfied*  
57  
58  
59  
60

1  
2  
3 *with my career*" [38]). Answers were given on a 5-point Likert scale (1=totally disagree, 5=totally  
4 agree).  
5  
6

7  
8  
9 The surveys sent on T2 and T3 additionally asked for perceived stress associated with the Covid-19  
10 situation. This was measured with items that are relevant for employees working during the Covid-19  
11 pandemic. Some specifically related to the work of health care workers as they may experience stress  
12 due to the health of their patients or colleagues who have a higher risk of infection (10 newly-  
13 developed items: "*How often do you experience stress caused by Covid-19 [for work (item 1)/ about*  
14 *the measures taken against Covid-19 (item 2)/ for your work-life balance (item 3)/ messages in the*  
15 *media (item 4)/ yourself (item 5)/ love ones (item 6)/ your patients (item 7)/ your colleagues (item 8)/*  
16 *the hospital where you work (item 9)/ the profession of physicians*" (item 10)], that were all rated on a  
17 5-point Likert scale (1=never, 5=very often)).  
18  
19  
20  
21  
22  
23  
24  
25  
26  
27  
28  
29

30 The University Medical Center Utrecht confirmed that this study fell outside the scope of the Dutch  
31 Law on Medical Research (WMO) and therefore formal ethical approval was not required (METc  
32 2019, 20/328).  
33  
34  
35  
36  
37  
38

### 39 **Patient and public involvement**

40  
41 This study was conducted among physicians; patients were not involved in this study. Physicians were  
42 involved in developing the surveys that were used in this study. The survey was pilot-tested among  
43 five physicians. They were interviewed about the content, wording, and style of addressing physicians  
44 in the survey. If needed, the content and the item wordings were adapted. Furthermore, the researchers  
45 of this study developed the surveys and interpreted results with the support of a senior board member,  
46 and two physicians, one from the academic and one from the general hospital. The outcomes of this  
47 study are discussed in both hospitals in a group of representative physicians from all departments.  
48  
49  
50  
51  
52  
53  
54  
55  
56  
57

### 58 **Data analysis**

To examine physicians' employability, a repeated measures analyses of variance (RM ANOVA) was performed with planned contrasts on Time (Helmert contrasts T1 vs. T2/T3) and with Time as a within-subject factor and Group as a between-subject factor.

Furthermore, one-way ANOVAs were performed to compare groups (physicians with surgical, medical or another specialty) and work experiences over time (T1, T2 and T3).

## Results

Table 1 presents the demographics of the respondents.

*Table 1: Demographics of participants (n=75)*

|                                                     |                                                                                                                                                                  |
|-----------------------------------------------------|------------------------------------------------------------------------------------------------------------------------------------------------------------------|
| <b>Gender</b>                                       | Male: $n=28$ (37%)<br>Female: $n=47$ (63%)                                                                                                                       |
| <b>Age</b>                                          | $M=44.9$ , $SD=7.8$                                                                                                                                              |
| <b>Work hours according to contract</b>             | $M=41.4$ , $SD=11.12$                                                                                                                                            |
| <b>Occupational tenure (years)</b>                  | $M=11.6$ , $SD=8.4$                                                                                                                                              |
| <b>Organizational tenure (years)</b>                | $M=9.6$ , $SD=8.0$                                                                                                                                               |
| <b>Type of employment contract</b>                  | Self-employed: $n=10$ (13%)<br>Contracted: $n=65$ (87%)                                                                                                          |
| <b>Specialty</b>                                    | Surgical: $n=14$ (19%)<br>Medical: $n=35$ (47%)<br>Other: $n=26$ (35%)                                                                                           |
| <b>Involved in care for Covid-19 patients at T2</b> | Yes: $n=24$ (32%), of which $n=6$ (25%) had a surgical specialty, $n=13$ (54%) had a medical specialty and $n=5$ (21%) had another specialty<br>No: $n=51$ (68%) |
| <b>Involved in care for Covid-19 patients at T3</b> | Yes: $n=19$ (25%), of which $n=4$ (21%) had a surgical specialty, $n=10$ (53%) had a medical specialty and $n=5$ (26%) had another specialty<br>No: $n=56$ (75%) |

### Employability is higher during the Covid-19 pandemic than before

RM ANOVAs show that physicians' perceived employability significantly increased over time (Figure 2). Specifically, physicians' mental and physical ability to work and to continue working in their current profession significantly increased from the time before the Covid-19 pandemic (T1) compared to the period during the Covid-19 pandemic (T2 and T3) ( $F(1,67)=4.954, p=0.029^*$ , *partial*  $\eta^2=0.069$ ). Similarly, physicians' willingness to work and to continue to work significantly increases from the time before the pandemic compared to the period during the pandemic ( $F(1,65)=11.125, p=0.001^{**}$ , *partial*  $\eta^2=0.146$ ).

*Please insert: Figure 2: Mean scores for employability on T1, T2 and T3*

We observe a similar significant increase in physicians' career satisfaction from prior to the Covid-19 pandemic (T1) to during the Covid-19 pandemic (T2 and T3) ( $F(1,72)=6.294, p=0.014^*$ , *partial*  $\eta^2=0.080$ ). No significant change was found for physicians' job satisfaction in this period. Moreover, no significant differences were found in the employability, job and career satisfaction for physicians who were involved in taking care for patients infected with the Covid-19 virus and physicians that were not involved in Covid-19 related care.

### Employability differs between specialties

Further analyses show that employability differs among physicians with surgical, medical and other specialties (Figure 3). At T1, surgical doctors are significantly less positive about their employability than physicians with medical or other specialties (ability:  $F(2,71)=6.412, p=0.003^{**}$ , *partial*  $\eta^2=0.153$ ; willingness  $F(2,68)=4.200, p=0.019^*$ , *partial*  $\eta^2=0.110$ ). Further, during the first phase of the Covid-19 pandemic (T2), the employability of surgical doctors is still significantly lower than that of physicians with medical or other specialties (ability:  $F(2,70)=6.492, p=0.003^{**}$ , *partial*  $\eta^2=0.156$ ; willingness:  $F(2,71)=5.941, p=0.004^{**}$ , *partial*  $\eta^2=0.143$ ). At T3 there are no significant differences anymore between the employability of the three groups of medical specialties. Table 2 summarizes the differences in employability over time among physicians with surgical, medical, and other specialties.

Please insert: Figure 3: Mean scores for employability on T1, T2 and T3 for physicians with surgical, medical and other specialties

Table 2: Results one-way ANOVAs employability on T1, T2 and T3 for physicians with surgical, medical and other specialties (n=75)

| Variable                        | Time | Surgical |      | Medical |      | Other |      | F-values                            | Partial $\eta^2$ |
|---------------------------------|------|----------|------|---------|------|-------|------|-------------------------------------|------------------|
|                                 |      | M        | SD   | M       | SD   | M     | SD   |                                     |                  |
| Ability to continue working     | T1   | 3.00     | 1.22 | 3.83    | 0.79 | 3.96  | 0.64 | $F(2,71)=6.412$ ,<br>$p=0.003^{**}$ | 0.153            |
|                                 | T2   | 3.18     | 1.05 | 3.88    | 0.81 | 4.10  | 0.52 | $F(2,70)=6.492$ ,<br>$p=0.003^{**}$ | 0.156            |
|                                 | T3   | 3.64     | 1.08 | 3.91    | 0.96 | 4.13  | 0.71 | $F(2,69)=1.256$ ,<br>$p=0.291$      | X                |
| Willingness to continue working | T1   | 2.08     | 1.26 | 3.17    | 1.22 | 3.00  | 1.04 | $F(2,68)=4.200$ ,<br>$p=0.019^*$    | 0.110            |
|                                 | T2   | 2.29     | 1.07 | 3.38    | 0.99 | 3.12  | 0.99 | $F(2,71)=5.941$ ,<br>$p=0.004^{**}$ | 0.143            |
|                                 | T3   | 3.00     | 1.24 | 3.39    | 1.20 | 3.42  | 1.06 | $F(2,70)=0.700$ ,<br>$p=0.500$      | X                |

\*=significant at the 0.05 level (2-tailed), \*\* significant at the 0.01 level (2-tailed)

### Physicians' work experiences during the Covid-19 pandemic

We further examined how physicians experience their work during the Covid-19 pandemic. Table 3 shows that physicians experience a significant lower emotional workload ( $F(2,70)=10.579$ ,  $p<0.001^{**}$ ), physical workload ( $F(2,72)=5.159$ ,  $p=0.008^{**}$ ), and quantitative workload ( $F(2,62)=5.702$ ,  $p=0.005^{**}$ ) during an early phase of the Covid-19 pandemic (T2), compared to the time before the pandemic (T1). In a later phase of the pandemic (T3), the experience of workload showed a tendency to return to the pre-pandemic levels (T1) (Figure 4). There were no significant differences in the

experiences of these work characteristics for physicians who were involved in Covid-19 related care and physicians who were not.

**Please insert: Figure 4: Mean scores for work characteristics on T1, T2 and T3**

Table 3: Results one-way ANOVAs experience of work characteristics on T1, T2 and T3 (n=75)

| Work characteristics  | T1   |      | T2   |      | T3   |      | F-values                             | $\eta^2$ |
|-----------------------|------|------|------|------|------|------|--------------------------------------|----------|
|                       | M    | SD   | M    | SD   | M    | SD   |                                      |          |
| Emotional workload    | 2.70 | 0.67 | 2.45 | 0.63 | 2.51 | 0.67 | $F(2,70)=10.579$ ,<br>$p<0.001^{**}$ | 0.232    |
| Physical workload     | 2.61 | 0.98 | 2.34 | 0.93 | 2.65 | 0.99 | $F(2,72)=5.159$ ,<br>$p=0.008^{**}$  | 0.125    |
| Quantitative workload | 3.45 | 1.11 | 2.99 | 1.03 | 3.22 | 1.11 | $F(2,62)=5.702$ ,<br>$p=0.005^{**}$  | 0.155    |
| Job autonomy          | 3.82 | 0.80 | 3.64 | 0.54 | 3.76 | 0.60 | $F(2,63)=2.417$ ,<br>$p=0.097$       | x        |

\*=significant at the 0.05 level (2-tailed), \*\* significant at the 0.01 level (2-tailed)

### Stress factors during the Covid-19 pandemic

Physicians further reported to what extent they experience stress in several areas because of the Covid-19 pandemic (Figure 5). During an early phase of this pandemic (T2), physicians experienced the most stress from combining work and private life ( $M=2.63$ ;  $SD=1.27$ ), from work in general ( $M=2.49$ ;  $SD=0.95$ ) and due to the possible impact of Covid-19 on their loved ones' health ( $M=2.33$ ;  $SD=0.93$ ). They experienced the least stress for the possible consequences of Covid-19 for themselves ( $M=1.85$ ;  $SD=0.85$ ). During a later phase of the Covid-19 pandemic (T3), physicians reported to experience the most stress from their work in general ( $M=2.55$ ;  $SD=1.00$ ), from combining work and private life ( $M=2.47$ ;  $SD=1.12$ ), and due to the health of their patients ( $M=2.38$ ;  $SD=0.98$ ). Again, they reported to experience the least stress for the possible impact of Covid-19 on themselves ( $M=2.03$ ;  $SD=0.72$ ).

1  
2  
3  
4  
5 *Please insert: Figure 5: Mean scores on how often physicians experience stress in several areas on T2*  
6 *and T3 caused by Covid-19*  
7  
8  
9

## 10 11 12 **Discussion**

13  
14 The aim of this study was to provide insight into the impact of the Covid-19 pandemic on physicians' employability and work experiences. A longitudinal approach was used, which allowed us to compare physicians work experiences during the Covid-19 pandemic with the situation prior to the pandemic.

15  
16  
17  
18  
19  
20  
21  
22 Perhaps the most interesting finding of the present study was the fact that the perceived employability of physicians was significantly *higher* during the pandemic than it was before. Specifically, the results show that physicians' employability increases in the time prior to the Covid-19 pandemic to the early phase of the Covid-19 pandemic and continues to increase in a later phase of the Covid-19 pandemic.

23  
24  
25  
26  
27  
28  
29  
30  
31 This goes contrary to our expectations, since other studies found that physicians' work motivation decreases [10] and stress and burn-out increase during previous pandemics [11,12]. There are various substantive explanations for this increase in employability. It could be related to a change in physicians' work characteristics, or an increase in societal appreciation of health care professionals during the pandemic. This study shows that physicians experienced a lower workload during an early phase of the Covid-19 pandemic compared to the time prior to the pandemic. Workload has also been shown to correlate with employability. Therefore, a lower workload at this time could possibly explain why physicians perceive to be better able to continue working until their retirement. This is in line with research showing that job demands, such as workload, negatively relate to well-being and self-reported health [e.g. 15]. This suggests that having a period of lower job demands may be beneficial for an individual's well-being or related concepts such as employability. More research is needed to examine this further.

32  
33  
34  
35  
36  
37  
38  
39  
40  
41  
42  
43  
44  
45  
46  
47  
48  
49  
50  
51  
52  
53  
54  
55  
56  
57  
58  
59  
60  
More appreciation for physicians' work by society [9] may provide an alternative explanation for the increase in their employability. Physicians and other health care workers have been portrayed as 'heroes' [39], and citizens have expressed their support through a public applause and by placing

1  
2  
3 white t-shirts with red hearts in front of their windows. Physicians are on the shortlist of ‘vital  
4 professions’, which gives them certain privileges during the pandemic compared to people with other  
5 professions (e.g. they may use public transport and their children can still go to daycare and school).  
6  
7 This might have resulted in physicians feeling highly appreciated during the Covid-19 pandemic,  
8  
9 which may have boosted their ability and willingness to work and to continue their essential and  
10  
11 meaningful work.  
12  
13  
14  
15  
16  
17

18 A possible explanation for the different conclusions drawn in this study compared to other studies on  
19 the impact of previous pandemics [10-12] may be the result of a different approach taken in our study  
20 compared to these past studies. Earlier studies drew conclusions on the basis of cross-sectional,  
21  
22 retrospective data. Recall biases are inherent to studies using retrospective techniques to understand a  
23  
24 change in experience over time [29]. Studies have shown that when respondents have reason to believe  
25  
26 in change, they will report change when they are asked to reflect on the past, even if no change has  
27  
28 occurred [29]. In a crisis situation, such as a pandemic, respondents may believe that they were more  
29  
30 positive before the outbreak of a pandemic than during the pandemic. This perspective is likely to be  
31  
32 strengthened by the public debate where the negative impact of the pandemic on health care workers  
33  
34 has frequently been emphasized. A strength of our study is that we used real-time data collection,  
35  
36 instead of retrospective methods. We asked physicians about things that they *can* report, namely their  
37  
38 current experiences at the moment of taking the survey, i.e. they reported on their current feelings, not  
39  
40 on their perceptions of their feelings in the past. This approach allows for drawing considerably more  
41  
42 reliable conclusions about physicians’ work experiences prior to a pandemic and during a pandemic  
43  
44 than is possible using non-longitudinal methodologies.  
45  
46  
47  
48  
49  
50

51 Physicians employability differed across surgical, medical and other specialties. This difference is also  
52  
53 apparent before the Covid-19 pandemic. This is in line with previous studies showing that physicians  
54  
55 with different specialties experience their work differently. There are for instance significant  
56  
57 differences in job stressors, demands and resources among medical specialties [e.g. 40]. Another  
58  
59 interesting finding is that the employability of physicians with surgical specialties increased stronger  
60



1  
2  
3 from the time prior to the Covid-19 pandemic to the time during the Covid-19 pandemic compared to  
4 physicians with medical or other specialties. We tested whether this difference is caused by the degree  
5 of involvement with care for Covid-19 patients, but this was not the case. Other factors might explain  
6 this difference. Physicians with different specialties had very diverse roles during the Covid-19  
7 pandemic. While some physicians were directly involved in taking care for Covid-19 patients, or were  
8 part of crisis teams, making very long workdays, other physicians work was significantly reduced due  
9 to postponed or cancelled non-Covid related care [41]. Therefore, the job demands of physicians with  
10 different specialties varied during the Covid-19 pandemic. For example, job demands for physicians  
11 with surgical specialties could be lower during the Covid-19 pandemic as they saw their work being  
12 reduced due to the cancellations of operations. This could have reduced their (physical) workload  
13 more strongly than the workload of physicians with medical or other specialties which could explain  
14 the rise in their employability.  
15  
16  
17  
18  
19  
20  
21  
22  
23  
24  
25  
26  
27  
28

### 29 **Limitations**

30  
31 This study has some limitations. First, although a longitudinal approach is highly relevant to  
32 understanding the impact of a pandemic over time, the disadvantage of this approach is a high attrition  
33 rate of participants. In this study, around one third of the participants did not complete all three  
34 surveys and were therefore excluded from the analyses. It is possible that nonresponders differed from  
35 responders, for example in terms of workload. However, non-significant non-response analyses show  
36 that it is unlikely that this has biased our results. Future studies in larger samples with low attrition  
37 rate, would enhance the generalizability of the findings.  
38  
39  
40  
41  
42  
43  
44  
45

46 Second, some questions in this study might generate a recall bias as they ask for past  
47 situations, for instance in the items measuring emotional workload asking for the existence of  
48 emotionally demanding past situations. We believe that this bias is limited, as we did not use  
49 retrospective questions in this study. Further, research has shown that people are usually able to  
50 remember long-term periods or specific events, such as the Covid-19 pandemic [29].  
51  
52  
53  
54  
55  
56  
57  
58

### 59 **Study implications**

1  
2  
3 This study contributes to the body of knowledge about the psychological impact of the Covid-19  
4 pandemic on health care workers. It shows that the Covid-19 pandemic does not necessarily affect  
5 health care workers negatively; rather, it may also result in positive outcomes (i.e. increasing  
6 employability). As physicians work experiences are dynamic, a longitudinal approach is necessary to  
7 capture the dynamics of a pandemic on physicians work experiences. Furthermore, this study is  
8 valuable to practice as the healthcare system's ability to cope during an influenza pandemic will  
9 depend, to a large extent, on the number of health care workers, including physicians, who are able  
10 and willing to work through the crisis [8]. This study can inform global health actors that develop  
11 human resource strategies for dealing with the aftermath of the Covid-19 outbreak on health care  
12 workers. This study shows that physicians with surgical, medical and other specialties experience the  
13 Covid-19 pandemic differently. Therefore, tailor-made human resource strategies seem appropriate  
14 that pay attention to the specific needs of individual physicians.  
15  
16  
17  
18  
19  
20  
21  
22  
23  
24  
25  
26  
27  
28  
29  
30

### 31 **Conclusion**

32 This is the first study to provide evidence on the effects of the Covid-19 pandemic on physicians'  
33 employability and work experience, using a longitudinal approach with real-time data at three  
34 moments in time. We found evidence that physicians' employability significantly increased from the  
35 time prior to the pandemic to the period during the Covid-19 pandemic. Also, physicians experience a  
36 lower workload during the first peak of the Covid-19 pandemic compared to the time before the  
37 pandemic. At a later phase in the pandemic, their experiences of workload bounce back to initial  
38 levels. These results show that employability and work experiences vary, not only over time, but also  
39 in different phases of the Covid-19 pandemic. Physicians further experience the most stress from the  
40 impact of Covid-19 on their work in general and from combining work and private life.  
41  
42  
43  
44  
45  
46  
47  
48  
49  
50  
51  
52  
53

### 54 **Footnotes**

55  
56 **Funding:** This research received no specific grant from any funding agency in the public, commercial  
57 or not-for-profit sectors.  
58  
59

60 **Competing interests:** None declared.

1  
2  
3 **Patient and public involvement:** Patients and/or the public were not involved in the design, or  
4  
5 conduct, or reporting, or dissemination plans of this research. The survey was co-constructed with the  
6  
7 authors, some of them work within the hospital. The survey was also pilot tested with physicians who  
8  
9 gave feedback on it.  
10

11 **Patient consent for publication:** Not required.  
12

13 **Ethics approval:** The Ethical Committee of the University Medical Center Utrecht confirmed that this  
14  
15 study falls outside the scope of the Dutch Law on Medical Research (WMO) and therefore formal  
16  
17 ethical approval was not required (METc 2019, 20/328).  
18

19 **Data availability statement:** Raw data are available upon reasonable request. Ethical restrictions  
20  
21 related to participant confidentiality prohibit the authors from making the dataset publicly available.  
22  
23

24 **Authors' contributions:** All authors conceptualized the research project. EvL coordinated the study  
25  
26 and gathered participants. EvL analyzed the data and drafted the manuscript. All authors reviewed and  
27  
28 provided comments and revisions. TT, EvR, JWL and EK secured funding for the project. All authors  
29  
30 read and approved the final manuscript.  
31  
32  
33  
34  
35  
36  
37  
38  
39  
40  
41  
42  
43  
44  
45  
46  
47  
48  
49  
50  
51  
52  
53  
54  
55  
56  
57  
58  
59  
60

## References

- 1 Pappa S, Ntella V, Giannakas T, Giannakoulis VG, Papoutsis E, Katsaounou P. Prevalence of depression, anxiety, and insomnia among healthcare workers during the COVID-19 pandemic: A systematic review and meta-analysis. *Brain, behavior, and Immunity* 2020;**88**:901-907. doi:[10.1016/j.bbi.2020.05.026](https://doi.org/10.1016/j.bbi.2020.05.026)
- 2 Ripp J, Peccoraro L, Charney D. Attending to the emotional well-being of the health care workforce in a New York city health system during the Covid-19 pandemic. *Acad Med* 2020;**64**:1–4. doi:10.1097/ACM.0000000000003414
- 3 Smith CC. The structural vulnerability of healthcare workers during COVID-19: Observations on the social context of risk and the equitable distribution of resources. *Soc Sci Med* 2020;**258**:1–4. doi:10.1016/j.socscimed.2020.113119
- 4 Pfefferbaum B, North CS. Mental health and the Covid-19 pandemic. *N Engl J Med* Published Online First: 2020. doi:10.1056/NEJMp2008017
- 5 Cooch N. The psychological impact of Covid-19 on physicians: Lessons from previous outbreaks. 02-06-2020. 2020.<https://www.practiceupdate.com/content/the-psychological-impact-of-covid-19-on-physicians-lessons-from-previous-outbreaks/100995/45?trendmd-shared=0> (accessed 9 Jul 2020).
- 6 Fargen KM, Leslie-Mazwi TM, Klucznik RP, *et al*. The professional and personal impact of the coronavirus pandemic on US neurointerventional practices: a nationwide survey The Pandemic and Neurointervention. *J Neurointerv Surg* 2020;**12**. doi:10.1136/neurintsurg-2020-016513
- 7 Lai J, Ma S, Wang Y, *et al*. Factors associated with mental health outcomes among health care workers exposed to coronavirus disease 2019. *JAMA Netw Open* 2020;**3**:1–12. doi:10.1001/jamanetworkopen.2020.3976
- 8 Ives J, Greenfield S, Parry JM, *et al*. Healthcare workers' attitudes to working during

- 1  
2  
3 pandemic influenza: a qualitative study. *BMC Public Health* 2009;**9**:1–13.  
4  
5 doi:10.1186/1471-2458-9-56  
6  
7  
8 9 Vindrola-Padros C, Andrews L, Dowrick A, *et al.* Perceptions and experiences of  
9  
10 healthcare workers during the COVID-19 pandemic in the UK. *BMJ Open* 2020;**10**:1–  
11  
12 8. doi:10.1136/BMJOPEN-2020-040503  
13  
14  
15 10 Imai H, Matsuishi K, Ito A, *et al.* Factors associated with motivation and hesitation to  
16  
17 work among health professionals during a public crisis: a cross sectional study of  
18  
19 hospital workers in Japan during the pandemic (H1N1) 2009. *BMC Public Health*  
20  
21 2010;**10**:1–8. doi:10.1186/1471-2458-10-672  
22  
23  
24 11 Liu X, Kakade M, Fuller CJ, *et al.* Depression after exposure to stressful events:  
25  
26 lessons learned from the severe acute respiratory syndrome epidemic. *Compr*  
27  
28 *Psychiatry* 2012;**53**. doi:10.1016/j.comppsy.2011.02.003  
29  
30  
31 12 Maunder RG, Lancee WJ, Balderson KE, *et al.* Long-term psychological and  
32  
33 occupational effects of providing hospital healthcare during SARS outbreak. *Emerging*  
34  
35 *Infect Dis* 2006;**12**:1924–32. doi:10.3201/eid1212.060584  
36  
37  
38 13 Bakker AB, Van Veldhoven M, Xanthopoulou D. Beyond the demand-control model. *J*  
39  
40 *Pers Psychol* 2010;**9**:3–16. doi:10.1027/1866-5888/a000006  
41  
42  
43 14 Karasek RA. Job demands, job decision latitude, and mental strain: Implications for job  
44  
45 redesign. *Adm Sci Q* 1979;**24**:285–  
46  
47 308. [https://www.jstor.org/stable/pdf/2392498.pdf?casa\\_token=Lv7e61ddZFkAAAAA:](https://www.jstor.org/stable/pdf/2392498.pdf?casa_token=Lv7e61ddZFkAAAAA:cDIPyGRTkgjcINSmVIIVUYGHt0E2srz5VXhjl3ak28KDkdFVZRDUx-g9yeZF8Vm3XAAAdRPJQ5z3Mh-opCYGqlqZIK-GjAajHupaW4G1TQUayGhs9IIua)  
48  
49 [cDIPyGRTkgjcINSmVIIVUYGHt0E2srz5VXhjl3ak28KDkdFVZRDUx-](https://www.jstor.org/stable/pdf/2392498.pdf?casa_token=Lv7e61ddZFkAAAAA:cDIPyGRTkgjcINSmVIIVUYGHt0E2srz5VXhjl3ak28KDkdFVZRDUx-g9yeZF8Vm3XAAAdRPJQ5z3Mh-opCYGqlqZIK-GjAajHupaW4G1TQUayGhs9IIua)  
50  
51 [g9yeZF8Vm3XAAAdRPJQ5z3Mh-opCYGqlqZIK-GjAajHupaW4G1TQUayGhs9IIua](https://www.jstor.org/stable/pdf/2392498.pdf?casa_token=Lv7e61ddZFkAAAAA:cDIPyGRTkgjcINSmVIIVUYGHt0E2srz5VXhjl3ak28KDkdFVZRDUx-g9yeZF8Vm3XAAAdRPJQ5z3Mh-opCYGqlqZIK-GjAajHupaW4G1TQUayGhs9IIua)  
52  
53 (accessed 15 Feb 2021).  
54  
55  
56 15 De Lange AH, Taris TW, Kompier MAJ, *et al.* The very best of the millennium:  
57  
58 longitudinal research and the Demand-Control-(Support) Model. *J Occup Health*  
59  
60

- 1  
2  
3 *Psychol* 2003;**8**:282–305. doi:10.1037/1076-8998.8.4.282  
4  
5  
6 16 De Cuyper N, Sulea C, Philippaers K, *et al*. Perceived employability and performance:  
7  
8 moderation by felt job insecurity. *Pers Rev* 2014;**43**:536–52. doi:10.1108/PR-03-2013-  
9  
10 0050  
11  
12 17 Kirves K, Kinnunen U, De Cuyper N, *et al*. Trajectories of perceived employability  
13  
14 and their associations with well-being at work. *J Pers Psychol* 2014;**13**:46–57.  
15  
16 doi:10.1027/1866-5888/a000103  
17  
18  
19 18 Akkermans J, Seibert SE, Mol ST. Tales of the unexpected. Integrating career shocks  
20  
21 in the contemporary career literature. *SA J Ind Psychol* 2018;**44**:1–10.  
22  
23 doi:10.4102/sajip.v44i0.1503  
24  
25  
26 19 Akkermans J, Richardson J, Kraimer ML. The Covid-19 crisis as a career shock:  
27  
28 Implications for careers and vocational behavior. *J Vocat Behav* 2020;**119**:1–5.  
29  
30 doi:10.1016/J.JVB.2020.103434  
31  
32  
33 20 Wallace JE, Lemaire JB, Ghali WA. Physician wellness: A missing quality indicator.  
34  
35 *Lancet* 2009;**374**:1714–21. doi:10.1016/S0140-6736(09)61424-0  
36  
37  
38 21 Maunder R. The experience of the 2003 SARS outbreak as a traumatic stress among  
39  
40 frontline healthcare workers in Toronto: lessons learned. *Philos Trans R Soc London*  
41  
42 2004;**359**:1117–25. doi:10.1098/rstb.2004.1483  
43  
44  
45 22 Naushad VA, Bierens JJ, Nishan KP, *et al*. A systematic review of the impact of  
46  
47 disaster on the mental health of medical responders. *Prehosp Disaster Med*  
48  
49 2019;**34**:632–43. doi:10.1017/S1049023X19004874  
50  
51  
52 23 Wu Y, Wang J, Luo C, *et al*. A comparison of burnout frequency among oncology  
53  
54 physicians and nurses working on the frontline and usual wards during the COVID-19  
55  
56 epidemic in Wuhan, China. *Journal of pain and symptom management* 2020;**60**:e60-  
57  
58 e65. doi:10.1016/j.jpainsyman.2020.04.008  
59  
60

- 1  
2  
3 24 Tiete J, Guatteri M, Lachaux A, Matossian A, Hougardy JM, Loas G, Rotsaert M.  
4  
5 Mental health outcomes in healthcare workers in COVID-19 and non-COVID-19 care  
6  
7 units: a cross-sectional survey in Belgium. *Frontiers in Psychol* 2020;**11**:1-10.  
8  
9 doi:10.3389/fpsyg.2020.612241  
10  
11  
12 25 Willan J, King AJ, Jeffery K, *et al.* Challenges for NHS hospitals during Covid-19  
13  
14 epidemic. *BMJ* 2020;**368**:1–2. doi:10.1136/bmj.m1117  
15  
16  
17 26 Tan, B. Y., Chew, N. W., Lee, G. K., Jing, M., Goh, Y., Yeo, L. L., ... & Shanmugam  
18  
19 GN. Psychological impact of the Covid-19 pandemic on health care workers in  
20  
21 Singapore. *Ann Intern Med* 2020;:1–3. doi:10.7326/M20-1083  
22  
23  
24 27 Chong MY, Wang WC, Hsieh WC, *et al.* Psychological impact of severe acute  
25  
26 respiratory syndrome on health workers in a tertiary hospital. *Br J Psychiatry*  
27  
28 2004;**185**:127–33.  
29  
30  
31 28 Preti E, Di Mattei V, Perego G, *et al.* The psychological impact of epidemic and  
32  
33 pandemic outbreaks on healthcare workers: rapid review of the evidence. *Curr*  
34  
35 *Psychiatry Rep* 2020;**22**:1–22. doi:10.1007/s11920-020-01166-z  
36  
37  
38 29 Schwarz N. Retrospective and concurrent self-reports: The rationale for real-time data  
39  
40 capture. In: Stone A, Shiffman SS, Atienza A, *et al.*, eds. *The science of real-time data*  
41  
42 *capture: Self-reports in health research*. New York: : Oxford University Press 2007.  
43  
44 11–26.[https://dornsife.usc.edu/assets/sites/780/docs/schwarz\\_retrospective\\_self-](https://dornsife.usc.edu/assets/sites/780/docs/schwarz_retrospective_self-reports_mdc_2007.pdf)  
45  
46 [reports\\_mdc\\_2007.pdf](https://dornsife.usc.edu/assets/sites/780/docs/schwarz_retrospective_self-reports_mdc_2007.pdf)  
47  
48  
49 30 Van Leeuwen, E. H., Knies, E., Van Rensen, E. L. J., Taris TW. Stimulating perceived  
50  
51 ability and willingness to continue working and job crafting behaviour of physicians:  
52  
53 An intervention study. In: *Dutch HRM Network Conference*. Tilburg: 2019.  
54  
55  
56 31 RIVM. Current information about Covid-19. [https://www.rivm.nl/en/coronavirus-](https://www.rivm.nl/en/coronavirus-covid-19/current-information)  
57  
58 [covid-19/current-information](https://www.rivm.nl/en/coronavirus-covid-19/current-information). Retrieved on 13<sup>th</sup> of July 2021.  
59  
60

- 1  
2  
3 32 Blank, J. L. T., Niaounakis TK. Productiviteitsontwikkelingen bij medisch specialisten:  
4 Resultaten en technische rapportage. Delft: 2019.  
5  
6  
7  
8 33 Van Veldhoven, M., Prins, J., Van der Laken, P., Dijkstra L. *VBBA 2.0: Update van de*  
9 *standaard voor vragenlijstonderzoek naar werk, welbevinden en prestaties*. Enschede:  
10 Gildeprint 2014.  
11  
12  
13  
14 34 Demerouti E, Le Blanc PM, Bakker AB, *et al*. Present but sick: a three-wave study on  
15 job demands, presenteeism and burnout. *Career Dev Int* 2009;**14**:50–68.  
16  
17  
18  
19  
20  
21  
22  
23  
24  
25  
26  
27  
28  
29  
30  
31  
32  
33  
34  
35  
36  
37  
38  
39  
40  
41  
42  
43  
44  
45  
46  
47  
48  
49  
50  
51  
52  
53  
54  
55  
56  
57  
58  
59  
60
- 35 35 Morgeson FP, Humphrey SE. The work design questionnaire (WDQ): Developing and  
validating a comprehensive measure for assessing job design and the nature of work. *J  
Appl Psychol* 2006;**91**:1321–39. doi:10.1037/0021-9010.91.6.1321
- 36 36 Oude Hengel KM, Blatter BM, Geuskens GA, *et al*. Factors associated with the ability  
and willingness to continue working until the age of 65 in construction workers. *Int  
Arch Occup Environ Health* 2012;**85**:783–90. doi:10.1007/s00420-011-0719-3
- 37 37 Wanous JP, Reichers AE, Hudy MJ. Overall job satisfaction: How good are single-item  
measures? *J Appl Psychol* 1997;**82**:247–52. doi:10.1037/0021-9010.82.2.247
- 38 38 Martins LL, Eddleston KA, Veiga JF. Moderators of the relationship between work-  
family conflict and career satisfaction. *Acad Manag J* 2002;**45**:399–409.  
doi:10.5465/3069354
- 39 39 Van Dooren W, Noordegraaf M. Staging science: Authoritativeness and fragility of  
models and measurement in the Covid-19 crisis. *Public Adm Rev* 2020;**80**:610–5.  
doi:10.1111/puar.13219
- 40 40 Bernburg M, Vitzthum K, Groneberg DA, *et al*. Physicians' occupational stress,  
depressive symptoms and work ability in relation to their working environment: a  
cross-sectional study of differences among medical residents with various specialties



1  
2  
3 working in German hospitals. *BMJ Open* 2016;**6**:1–9. doi:10.1136/BMJOPEN-2016-  
4  
5 011369

- 6  
7  
8 41 Fowler A, Abbott TEF, Pearse RM. Can we safely continue to offer surgical treatments  
9  
10 during the COVID-19 pandemic? *BMJ Qual Saf* Published Online First: 20 November  
11  
12 2020. doi:10.1136/BMJQS-2020-012544  
13  
14  
15  
16  
17  
18  
19  
20  
21  
22  
23  
24  
25  
26  
27  
28  
29  
30  
31  
32  
33  
34  
35  
36  
37  
38  
39  
40  
41  
42  
43  
44  
45  
46  
47  
48  
49  
50  
51  
52  
53  
54  
55  
56  
57  
58  
59  
60

For peer review only

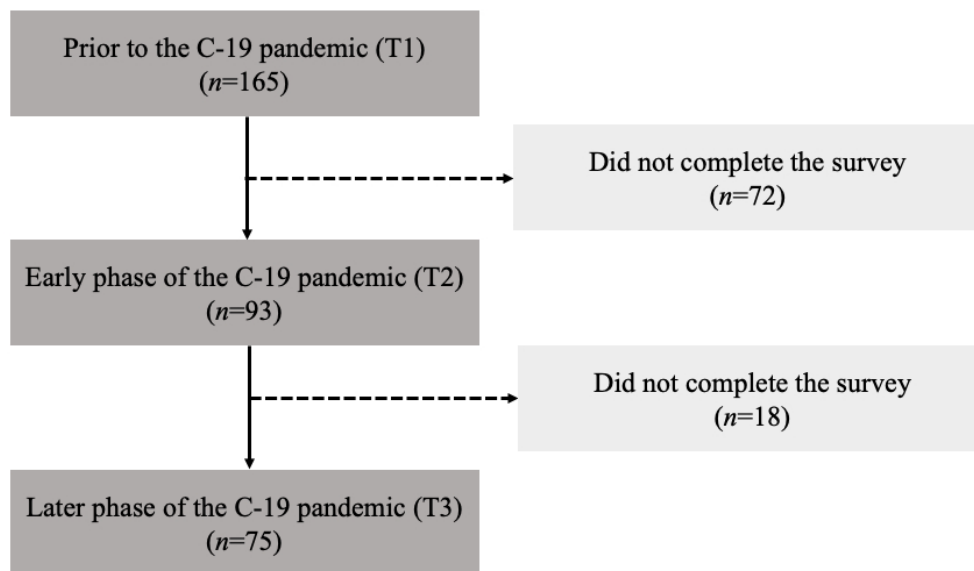

303x177mm (72 x 72 DPI)

1  
2  
3  
4  
5  
6  
7  
8  
9  
10  
11  
12  
13  
14  
15  
16  
17  
18  
19  
20  
21  
22  
23  
24  
25  
26  
27  
28  
29  
30  
31  
32  
33  
34  
35  
36  
37  
38  
39  
40  
41  
42  
43  
44  
45  
46  
47  
48  
49  
50  
51  
52  
53  
54  
55  
56  
57  
58  
59  
60

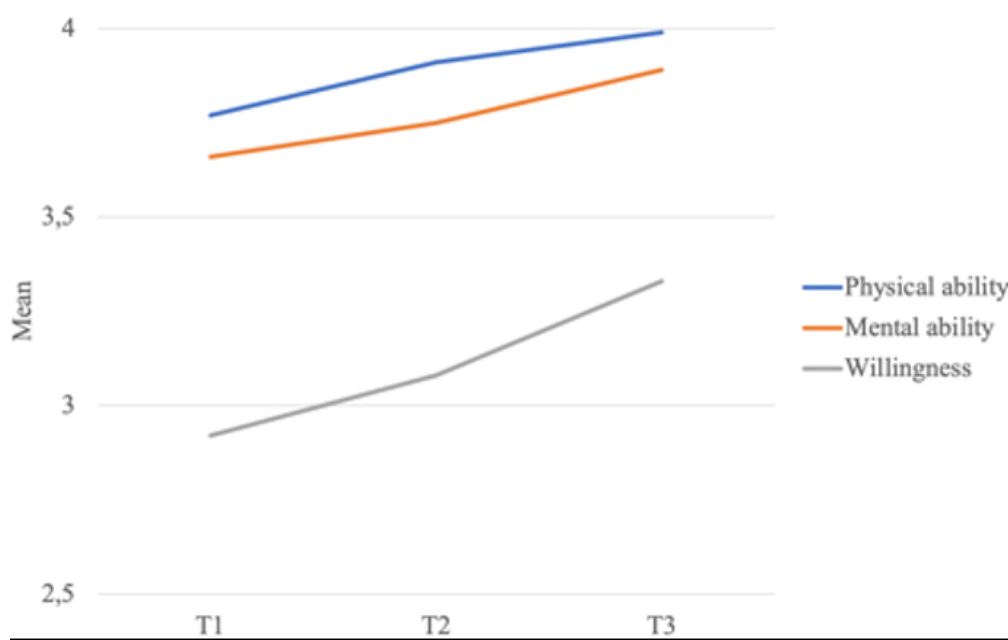

294x186mm (59 x 59 DPI)

1  
2  
3  
4  
5  
6  
7  
8  
9  
10  
11  
12  
13  
14  
15  
16  
17  
18  
19  
20  
21  
22  
23  
24  
25  
26  
27  
28  
29  
30  
31  
32  
33  
34  
35  
36  
37  
38  
39  
40  
41  
42  
43  
44  
45  
46  
47  
48  
49  
50  
51  
52  
53  
54  
55  
56  
57  
58  
59  
60

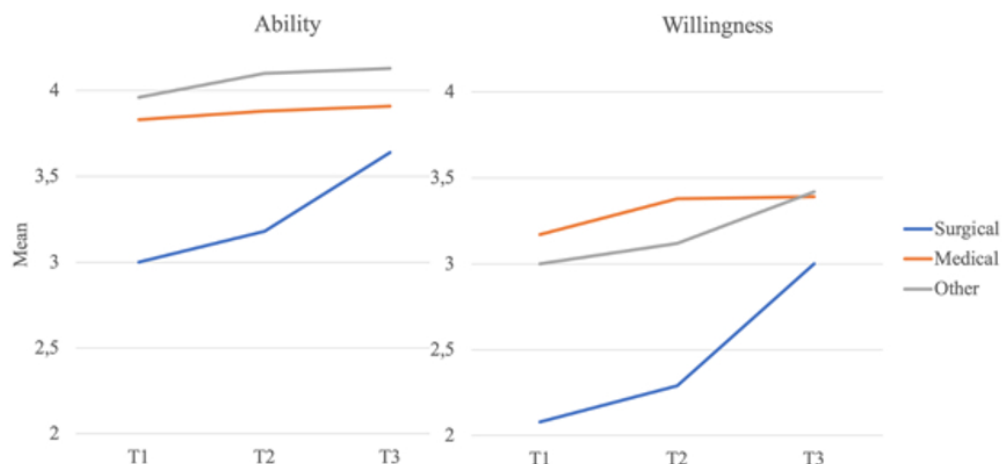

370x170mm (59 x 59 DPI)

1  
2  
3  
4  
5  
6  
7  
8  
9  
10  
11  
12  
13  
14  
15  
16  
17  
18  
19  
20  
21  
22  
23  
24  
25  
26  
27  
28  
29  
30  
31  
32  
33  
34  
35  
36  
37  
38  
39  
40  
41  
42  
43  
44  
45  
46  
47  
48  
49  
50  
51  
52  
53  
54  
55  
56  
57  
58  
59  
60

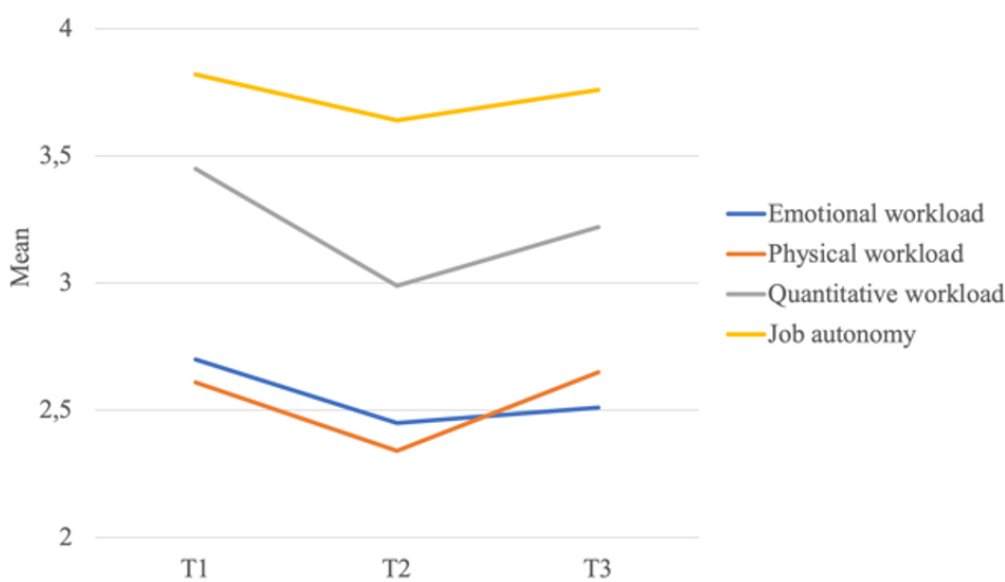

406x232mm (59 x 59 DPI)

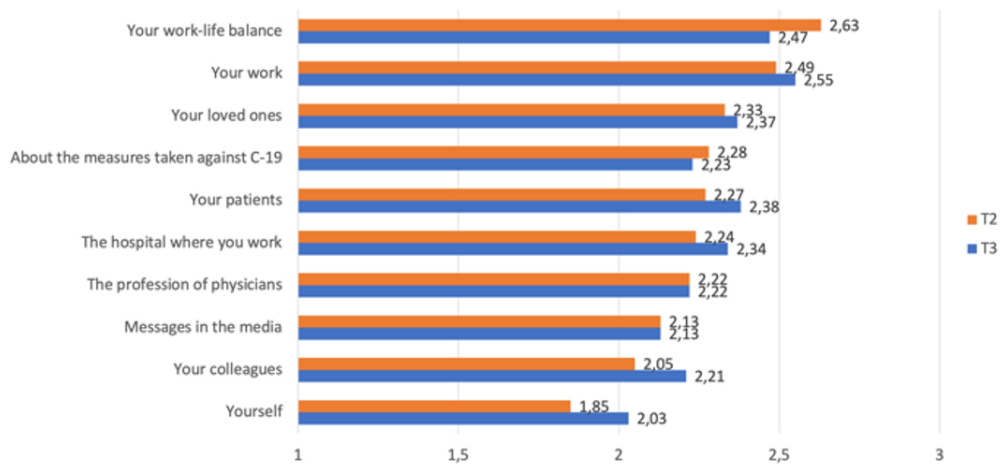

459x213mm (59 x 59 DPI)

STROBE Statement—Checklist of items that should be included in reports of *cohort studies*

|                              | Item No | Recommendation                                                                                                                                                                                                                                                                                                                                                                                                                           |
|------------------------------|---------|------------------------------------------------------------------------------------------------------------------------------------------------------------------------------------------------------------------------------------------------------------------------------------------------------------------------------------------------------------------------------------------------------------------------------------------|
| <b>Title and abstract</b>    | 1       | (a) Indicate the study's design with a commonly used term in the title or the abstract<br>(b) Provide in the abstract an informative and balanced summary of what was done and what was found                                                                                                                                                                                                                                            |
| <b>Introduction</b>          |         |                                                                                                                                                                                                                                                                                                                                                                                                                                          |
| Background/rationale         | 2       | Explain the scientific background and rationale for the investigation being reported                                                                                                                                                                                                                                                                                                                                                     |
| Objectives                   | 3       | State specific objectives, including any prespecified hypotheses                                                                                                                                                                                                                                                                                                                                                                         |
| <b>Methods</b>               |         |                                                                                                                                                                                                                                                                                                                                                                                                                                          |
| Study design                 | 4       | Present key elements of study design early in the paper                                                                                                                                                                                                                                                                                                                                                                                  |
| Setting                      | 5       | Describe the setting, locations, and relevant dates, including periods of recruitment, exposure, follow-up, and data collection                                                                                                                                                                                                                                                                                                          |
| Participants                 | 6       | (a) Give the eligibility criteria, and the sources and methods of selection of participants. Describe methods of follow-up<br>(b) For matched studies, give matching criteria and number of exposed and unexposed (NA)                                                                                                                                                                                                                   |
| Variables                    | 7       | Clearly define all outcomes, exposures, predictors, potential confounders, and effect modifiers. Give diagnostic criteria, if applicable (NA)                                                                                                                                                                                                                                                                                            |
| Data sources/<br>measurement | 8*      | For each variable of interest, give sources of data and details of methods of assessment (measurement). Describe comparability of assessment methods if there is more than one group                                                                                                                                                                                                                                                     |
| Bias                         | 9       | Describe any efforts to address potential sources of bias                                                                                                                                                                                                                                                                                                                                                                                |
| Study size                   | 10      | Explain how the study size was arrived at                                                                                                                                                                                                                                                                                                                                                                                                |
| Quantitative variables       | 11      | Explain how quantitative variables were handled in the analyses. If applicable, describe which groupings were chosen and why                                                                                                                                                                                                                                                                                                             |
| Statistical methods          | 12      | (a) Describe all statistical methods, including those used to control for confounding<br>(b) Describe any methods used to examine subgroups and interactions<br>(c) Explain how missing data were addressed<br>(d) If applicable, explain how loss to follow-up was addressed<br>(e) Describe any sensitivity analyses                                                                                                                   |
| <b>Results</b>               |         |                                                                                                                                                                                                                                                                                                                                                                                                                                          |
| Participants                 | 13*     | (a) Report numbers of individuals at each stage of study—eg numbers potentially eligible, examined for eligibility, confirmed eligible, included in the study, completing follow-up, and analysed<br>(b) Give reasons for non-participation at each stage<br>(c) Consider use of a flow diagram (not included yet, could still be included but I think it is clear from the text and I am not sure whether it increases the readability) |
| Descriptive data             | 14*     | (a) Give characteristics of study participants (eg demographic, clinical, social) and information on exposures and potential confounders<br>(b) Indicate number of participants with missing data for each variable of interest<br>(c) Summarise follow-up time (eg, average and total amount)                                                                                                                                           |
| Outcome data                 | 15*     | Report numbers of outcome events or summary measures over time                                                                                                                                                                                                                                                                                                                                                                           |
| Main results                 | 16      | (a) Give unadjusted estimates and, if applicable, confounder-adjusted estimates and their precision (eg, 95% confidence interval). Make clear which confounders were adjusted for and why they were included<br>(b) Report category boundaries when continuous variables were categorized<br>(c) If relevant, consider translating estimates of relative risk into absolute risk for a                                                   |

|                          |    |                                                                                                                                                                            |
|--------------------------|----|----------------------------------------------------------------------------------------------------------------------------------------------------------------------------|
|                          |    | meaningful time period                                                                                                                                                     |
| Other analyses           | 17 | Report other analyses done—eg analyses of subgroups and interactions, and sensitivity analyses                                                                             |
| <b>Discussion</b>        |    |                                                                                                                                                                            |
| Key results              | 18 | Summarise key results with reference to study objectives                                                                                                                   |
| Limitations              | 19 | Discuss limitations of the study, taking into account sources of potential bias or imprecision. Discuss both direction and magnitude of any potential bias                 |
| Interpretation           | 20 | Give a cautious overall interpretation of results considering objectives, limitations, multiplicity of analyses, results from similar studies, and other relevant evidence |
| Generalisability         | 21 | Discuss the generalisability (external validity) of the study results                                                                                                      |
| <b>Other information</b> |    |                                                                                                                                                                            |
| Funding                  | 22 | Give the source of funding and the role of the funders for the present study and, if applicable, for the original study on which the present article is based              |

\*Give information separately for exposed and unexposed groups.

**Note:** An Explanation and Elaboration article discusses each checklist item and gives methodological background and published examples of transparent reporting. The STROBE checklist is best used in conjunction with this article (freely available on the Web sites of PLoS Medicine at <http://www.plosmedicine.org/>, Annals of Internal Medicine at <http://www.annals.org/>, and Epidemiology at <http://www.epidem.com/>). Information on the STROBE Initiative is available at <http://www.strobe-statement.org>.



# BMJ Open

## A positive impact of the Covid-19 pandemic? A longitudinal study on the impact of the Covid-19 pandemic on physicians' work experiences and employability

|                                 |                                                                                                                                                                                                                                                                                                                              |
|---------------------------------|------------------------------------------------------------------------------------------------------------------------------------------------------------------------------------------------------------------------------------------------------------------------------------------------------------------------------|
| Journal:                        | <i>BMJ Open</i>                                                                                                                                                                                                                                                                                                              |
| Manuscript ID                   | bmjopen-2021-050962.R2                                                                                                                                                                                                                                                                                                       |
| Article Type:                   | Original research                                                                                                                                                                                                                                                                                                            |
| Date Submitted by the Author:   | 21-Sep-2021                                                                                                                                                                                                                                                                                                                  |
| Complete List of Authors:       | Leeuwen, Evelien; UMC Utrecht; Utrecht University School of Governance<br>Taris, Toon; Utrecht University, Social, Health and Organizational Psychology<br>van Rensen, Elizabeth; UMC Utrecht<br>Knies, Eva; Utrecht University School of Governance<br>Lammers, Jan-Willem; UMC Utrecht, Department of Respiratory Medicine |
| <b>Primary Subject Heading</b>: | Mental health                                                                                                                                                                                                                                                                                                                |
| Secondary Subject Heading:      | Mental health                                                                                                                                                                                                                                                                                                                |
| Keywords:                       | COVID-19, Human resource management < HEALTH SERVICES ADMINISTRATION & MANAGEMENT, MENTAL HEALTH                                                                                                                                                                                                                             |
|                                 |                                                                                                                                                                                                                                                                                                                              |

SCHOLARONE™  
Manuscripts



I, the Submitting Author has the right to grant and does grant on behalf of all authors of the Work (as defined in the below author licence), an exclusive licence and/or a non-exclusive licence for contributions from authors who are: i) UK Crown employees; ii) where BMJ has agreed a CC-BY licence shall apply, and/or iii) in accordance with the terms applicable for US Federal Government officers or employees acting as part of their official duties; on a worldwide, perpetual, irrevocable, royalty-free basis to BMJ Publishing Group Ltd ("BMJ") its licensees and where the relevant Journal is co-owned by BMJ to the co-owners of the Journal, to publish the Work in this journal and any other BMJ products and to exploit all rights, as set out in our [licence](#).

The Submitting Author accepts and understands that any supply made under these terms is made by BMJ to the Submitting Author unless you are acting as an employee on behalf of your employer or a postgraduate student of an affiliated institution which is paying any applicable article publishing charge ("APC") for Open Access articles. Where the Submitting Author wishes to make the Work available on an Open Access basis (and intends to pay the relevant APC), the terms of reuse of such Open Access shall be governed by a Creative Commons licence – details of these licences and which [Creative Commons](#) licence will apply to this Work are set out in our licence referred to above.

Other than as permitted in any relevant BMJ Author's Self Archiving Policies, I confirm this Work has not been accepted for publication elsewhere, is not being considered for publication elsewhere and does not duplicate material already published. I confirm all authors consent to publication of this Work and authorise the granting of this licence.

1  
2  
3 **Title: A positive impact of the Covid-19 pandemic? A longitudinal study on the impact of the**  
4 **Covid-19 pandemic on physicians' work experiences and employability**  
5  
6  
7  
8  
9

10  
11 Evelien H. van Leeuwen, MSc (corresponding author)

12 University Medical Center Utrecht, Heidelberglaan 100, 3584 CX Utrecht, the Netherlands

13  
14  
15 Tel. +31 (0)30-253 81 01

16  
17  
18 [e.h.vanleeuwen@umcutrecht.nl](mailto:e.h.vanleeuwen@umcutrecht.nl)  
19

20  
21  
22 Prof. dr. Toon W. Taris

23  
24 Utrecht University Social Sciences, Heidelberglaan 1, 3584 CS Utrecht, the Netherlands

25  
26  
27 [a.w.taris@uu.nl](mailto:a.w.taris@uu.nl)  
28

29  
30 Dr. Elizabeth L. J. van Rensen

31  
32 University Medical Center Utrecht, Heidelberglaan 100, 3584 CX Utrecht, the Netherlands

33  
34  
35 [e.l.j.vanrensen@umcutrecht.nl](mailto:e.l.j.vanrensen@umcutrecht.nl)  
36

37  
38  
39 Prof. dr. Eva Knies

40  
41 Utrecht University School of Governance, Bijlhouwerstraat 6, 3511 ZC Utrecht, the Netherlands

42  
43  
44 [e.knies@uu.nl](mailto:e.knies@uu.nl)  
45

46  
47 Prof. Dr. Jan-Willem J. Lammers

48  
49 University Medical Center Utrecht, Heidelberglaan 100, 3584 CX Utrecht, the Netherlands

50  
51  
52 [Jlammers026@gmail.com](mailto:Jlammers026@gmail.com)  
53

54  
55 Keywords: Covid-19, employability, mental health, well-being, Human Resource Management

56  
57 Wordcount: 4,913  
58  
59  
60

## Abstract

**Objective** – The Covid-19 pandemic places an enormous demand on physicians around the world.

The aim of this study was to examine the impact of the Covid-19 pandemic on physicians' work experiences and their ability and willingness to continue working in their profession until retirement (i.e. their employability).

**Design** - A longitudinal comparative design was used. Survey data were collected on three moments: before (May 2019), in the early phase (May 2020) and in a later phase (November 2020) of the Covid-19 pandemic. Time effects were tested using repeated-measures analyses of variance (RM ANOVA) and one-way analyses of variance (one-way ANOVA).

**Setting** – This study took place among physicians of two hospitals in a large city in the Netherlands.

**Participants** – 165 hospital physicians with surgical, medical and other specialties participated in this study.

**Results** – Physicians' employability significantly increased from the time prior to the Covid-19 pandemic, compared to the period during this pandemic. Employability differs among physicians with surgical, medical and other specialties. Furthermore, physicians experienced a lower emotional, physical and quantitative workload during the first peak of the Covid-19 pandemic, compared to before the pandemic. Moreover, physicians experienced the most stress from the impact of Covid-19 on their work in general and from combining work and private life.

**Conclusions** – This study shows that physicians' employability and work experiences are affected by the Covid-19 pandemic. Work experiences vary for physicians with different specialties. These varieties stress the importance of attention for physicians' individual needs and challenges regarding working during the Covid-19 pandemic, and the possibility of continuing work in the aftermath of this crisis. Based on this, physicians can be offered tailor-made solutions. This is important to maintain a healthy and employable workforce which is essential for a sustainable health care system.

### Strengths and limitations of this study

- The study captured the work experiences of physicians prior to and during the Covid-19 pandemic, allowing for within-person comparisons

- The study used a longitudinal study approach with data collected at three moments in time
- Despite the highly relevant longitudinal study approach, this has also resulted in participants dropout

## Introduction

Health care workers stand in the frontline of health care pandemics [1]. They are highly vulnerable during these pandemics, given the risk of exposure to the virus, concerns about infecting their loved ones, shortages of personal protective equipment, extended workload, and involvement in emotional and ethical decision making [2,3,4]. The Covid-19 pandemic is likely to have implications for health care workers' ability and willingness to work in the short-run and to continue their essential work on the frontlines in the long-run [5]. Evidence from earlier studies on the impact of the Covid-19 pandemic on health care workers, including meta-analyses and systematic reviews, show that the Covid-19 pandemic results in stress [6], illness, insomnia [1,7], fear for becoming infected [8], hesitation to work [9] or a lack of motivation to work [10] in the short-run. From previous research on crises we know that a pandemic may even result in more adverse consequences for physicians in the long-run, such as developing burn-out, psychological distress, and post-traumatic stress-disorder [11,12].

The possible consequences of crises for physicians make it important to monitor physicians' work experiences (i.e. their perceived workload, job autonomy and stress) and their ability and willingness to continue working in their profession (i.e. employability). It is important to prevent adverse consequences, because health care workers' well-being might be at stake. Studying physicians' work experiences helps to monitor their ability to work in the short-term. Especially job demands (such as workload) and job resources (such as job autonomy) have been shown to be important factors that affect well-being, stress and performance [13–15]. Furthermore, employability provides an indication of physicians' ability and willingness to continue working in their profession. Research has shown that employability positively affects well-being and performance [16,17]. Research has shown that crises, such as the Covid-19 pandemic, are so-called “career shocks” referring to disruptive and extraordinary

1  
2  
3 events caused by factors outside an individual's control, triggering a deliberate thought process  
4 concerning ones' career [18]. This may result in people reconsidering their position, leaving their  
5 profession or lower job or career satisfaction [19]. This challenges their employability, which is  
6 especially problematic in a health crisis as employable physicians are needed to handle the high  
7 demands for health care, and in the aftermath of the health crisis due to delayed operations and other  
8 treatments for instance.  
9  
10  
11  
12  
13  
14  
15  
16  
17

18 In this study we examine the impact of the Covid-19 pandemic on physicians' work experiences and  
19 employability, by addressing the following research question in the context of a three-wave  
20 prospective study: "What is the impact of the Covid-19 pandemic on physicians' work experiences  
21 (i.e. perceived workload, job autonomy and stress) and their ability and willingness to continue  
22 working in their profession (i.e. employability)?" Understanding the impact of the Covid-19 pandemic  
23 on physicians' work is important to be prepared for future outbreaks of health crises, as maintaining a  
24 healthy and employable workforce is essential for a sustainable health care system. These themes, and  
25 topics related to this, have to date received little attention, especially in a medical setting. Physicians  
26 tend to self-ignore attention for their well-being and health systems poorly support this [20],  
27 emphasizing the importance of this research.  
28  
29  
30  
31  
32  
33  
34  
35  
36  
37  
38  
39  
40

41 This study examines the impact of the Covid-19 pandemic on physicians with varying specialties.  
42 Previous studies have found mixed outcomes for the impact of the Covid-19 pandemic on health care  
43 workers working in different departments [21,22,23]. Some studies have shown that the impact of  
44 pandemics varies for health care workers working in different departments [22,23]. For instance, one  
45 study found that those who work in emergency departments, intensive care units, and isolation wards  
46 have a greater risk of developing adverse psychiatric outcomes than those working in other  
47 departments [22]. Another study found the opposite, physicians and nurses who worked in the  
48 frontline had a lower frequency of burn-out and were less worried about being infected with the  
49 Covid-19 virus compared to those working in usual wards [23]. Yet another study found no  
50 differences in mental health outcomes for physicians and nurses working in Covid-19 care units, non  
51  
52  
53  
54  
55  
56  
57  
58  
59  
60

1  
2  
3 Covid-19 care units or in both units [24]. Despite possible differences between physicians working in  
4 different departments, it is likely that pandemics, such as the Covid-19 pandemic, affects them all to  
5 some extent as their work has suddenly changed, both in terms of content (e.g. change in cases,  
6 increase in the use of video consults) and location (e.g. working from home or in different  
7 departments), and due to an uncertain future. These changes may result in various job demands such  
8 as a high (emotional) workload or stress [1,25] which may vary between groups of physicians. More  
9 research is needed to understand the impact of pandemics on physicians with different specialties. This  
10 study examines physicians with surgical, medical, and other specialties to examine the impact on their  
11 work and possible differences between specialties.  
12  
13  
14  
15  
16  
17  
18  
19  
20  
21  
22

23  
24 Studies examining the psychological effects of pandemics (e.g. SARS, H1N1 influenza and avian  
25 influenza H5N1), including recent studies into the Covid-19 pandemic, often use cross-sectional  
26 methods [7,10–12,26]. A disadvantage of this approach is that it cannot capture the dynamics of  
27 pandemics. The impact of pandemics on health care workers has been shown to vary in different  
28 phases of the pandemic. During the initial outbreak health care workers perceive feelings of extreme  
29 vulnerability, uncertainty, anxiety and threat while mental health problems such as depression are  
30 more likely to develop in a later phase [27]. For this reason, a longitudinal approach where  
31 experiences are measured at multiple points in time is more appropriate to study the impact of a  
32 pandemic. In this study we use a longitudinal approach by examining physicians experiences at three  
33 moments in time.  
34  
35  
36  
37  
38  
39  
40  
41  
42  
43  
44

45 In addition, a meta-analysis shows that these studies often use retrospective questions where  
46 respondents are asked for their past experiences [28]. This approach is problematic as psychologists  
47 and survey methodologists have shown that subjective experiences are poorly represented in memory.  
48 Retrospective questions often ask respondents for information that they cannot provide with any  
49 validity [29]. Therefore, examining behaviour and experiences by using real-time data is highly  
50 preferable [29]. This is done in this study by asking for physicians' current behaviour, at the three  
51 moments of taking the surveys.  
52  
53  
54  
55  
56  
57  
58  
59  
60

1  
2  
3 Based on prior studies into the impact of health crises on health care workers, together with  
4  
5 early evidence on the impact of the Covid-19 pandemic on health care workers, we expect that  
6  
7 physicians experience their work more negatively during the Covid-19 pandemic compared to the  
8  
9 situation prior to this pandemic, which will be reflected in a higher emotional, physical and  
10  
11 quantitative workload. Furthermore, we expect that physicians are more negative about their  
12  
13 employability during the pandemic, compared to the situation prior to the Covid-19 pandemic, and  
14  
15 have a lower job and career satisfaction during the pandemic compared to the time prior to the  
16  
17 pandemic.  
18  
19  
20  
21

## 22 Method

23  
24 Three surveys were sent to physicians in two hospitals in a large Dutch city, an academic hospital and  
25  
26 a general hospital. The first survey was sent as part of another study [30]. The sample size of this  
27  
28 study was therefore predetermined by the sample of the prior study that was calculated according to a  
29  
30 power analysis. The first survey was sent in May 2019 (T1), prior to the Covid-19 outbreak. A second  
31  
32 survey was sent in May 2020, in an early phase of the Covid-19 pandemic. This was one month after  
33  
34 the first peak of Covid-19 infections in the Netherlands [31]. At this time, both hospitals had  
35  
36 established a Covid-19 clinic and an Covid-19 intensive care unit which were separated from other  
37  
38 departments in the hospital. Furthermore, in both hospitals non-emergent care and surgeries were  
39  
40 postponed. Physicians and health care workers from different departments were requested to support  
41  
42 on the Covid-19 departments. Health care professionals were supported with volunteers from  
43  
44 “outside” who were not employed by the hospitals. The long period in which the Covid-19 pandemic  
45  
46 dominates the world, made it relevant to add a study wave in a later phase of the pandemic to examine  
47  
48 its longer-term consequences. Therefore, a third survey was sent in November 2020 (T3), one month  
49  
50 after the second peak of Covid-19 in the Netherlands. During the first and second peak of the number  
51  
52 of Covid-19 infections, there were 60 patients infected with the Covid-19 virus in the academic  
53  
54 hospital (20 on the intensive care and 40 in the Covid-19 clinic) and 30 in the general hospital (8 on  
55  
56 the intensive care and 22 in the Covid-19 clinic). When the surveys were sent at T2 and T3, many  
57  
58 countries, including the Netherlands, were partly or fully in lockdown, social distancing was required  
59  
60



1  
2  
3 and the number of patients infected with Covid-19 was high. In the two hospitals where this study  
4 took place, waiting lists for patients were higher at T3 than at T2 due to non-emergent care that was  
5 still being postponed.  
6  
7  
8  
9

10 Participants were recruited through promotional presentations and through an internal mailing list.  
11  
12 Participants provided informed consent at the start of each survey stating that participation is  
13 voluntary, outcomes are held confidential, participants can withdraw from the study at any time, and  
14 all study material was anonymized and saved on a protected server. 165 physicians participated in this  
15 study at T1. These 165 physicians were invited by e-mail to complete a second and a third survey. 93  
16 physicians completed the survey at T2 (response rate: 56%), and 75 physicians completed all three  
17 surveys (response rate: 45%). A flowchart of the participants in this study is presented in figure 1. We  
18 compared participants who completed all three surveys (T1, T2 and T3) ( $n=75$ ) with participants who  
19 only completed the survey sent at T1 ( $n=72$ ). Multivariate analysis of variance indicated that there  
20 were no significant differences between these participants in terms of age ( $F(1,124)=0.037, p=0.849$ ),  
21 hours worked according to contract ( $F(1,135)=0.555, p=0.458$ ), occupational tenure ( $F(1,133)=0.591,$   
22  $p=0.443$ ), and organisational tenure ( $F(1,129)=0.804, p=0.371$ ). For the dichotomous variables gender,  
23 hospital type (general vs. academic), type of specialism (surgical, medical vs. other, following the  
24 categorization of [32]) and type of employment contract (employed by the hospital vs. independently  
25 established) we conducted chi-square tests, again showing that there were no significant differences  
26 between participants who dropped out of this study and the participants who completed all three  
27 surveys (all  $p$ 's  $> 0.452$ ).  
28  
29  
30  
31  
32  
33  
34  
35  
36  
37  
38  
39  
40  
41  
42  
43  
44  
45  
46  
47

48 **Please insert: Figure 1: Flow chart of participants at T1, T2 and T3**  
49  
50  
51

52 Physicians provided several reasons for not completing the surveys sent at T2 and/or T3. At T2, 1  
53 physician had left the hospital, and 10 physicians were on leave (either a pregnancy leave, holiday  
54 leave or were abroad). At T3, 2 physicians had left the hospital, 10 physicians were on leave, and 1  
55 physician was “too busy” to complete the survey. These reasons, apart from the latter, are unlikely to  
56  
57  
58  
59  
60

1  
2  
3 result in biased outcomes. This, together with the non-significant results for the non-response analysis,  
4  
5 show that there are no significant differences between the participants who dropped out of this study  
6  
7 and the participants who completed all three surveys. The result section reports on the results of the  
8  
9 analyses based on the data from participants who completed the surveys on T1, T2 and T3 ( $n=75$ ).  
10  
11

12  
13 The questions addressed sociodemographic characteristics (gender, age), job characteristics  
14  
15 (specialism, autonomy, workload, occupational tenure referring to the time working as a medical  
16  
17 specialist and organizational tenure referring to the time working in their current hospital) and  
18  
19 involvement with care for patients with the Covid-19 virus. Most variables were measured with  
20  
21 validated scales, if available. Work characteristics were measured using validated scales from the  
22  
23 popular surveys: 'VBBA 2.0' [33] and the Work Design Questionnaire [34]. Physicians were asked to  
24  
25 rate their emotional workload (5 items: "*Is your job emotionally demanding?*", "*Are you confronted*  
26  
27 *in your work with things that affect you personally?*", "*Are you in your work in contact with difficult*  
28  
29 *patients or their relatives?*", "*Do you have to convince or persuade people for your job?*" and "*Do*  
30  
31 *you encounter emotionally demanding events in your work?*",  $\alpha_{T1}=0.96$ ;  $\alpha_{T2}=0.82$ ;  $\alpha_{T3}=0.82$ , [33]),  
32  
33 quantitative workload (3 items: "*Do you have too much work to do?*", "*Do you have to put in extra*  
34  
35 *effort to finish your work?*" and "*Do you have to hurry?*",  $\alpha_{T1}=0.90$ ;  $\alpha_{T2}=0.91$ ;  $\alpha_{T3}=0.93$ , [33]),  
36  
37 physical workload (1 item: "*My job is physically demanding*", [35]), and job autonomy (3 items: "*The*  
38  
39 *job allows me to decide on my own how to go about doing my work*", "*The job provides me with*  
40  
41 *significant autonomy in making decisions*" and "*The job gives me a chance to use my personal*  
42  
43 *initiative or judgment in carrying out the work*",  $\alpha_{T1}=0.80$ ;  $\alpha_{T2}=0.72$ ;  $\alpha_{T3}=0.79$ , [34]). Answers were  
44  
45 given on a 5-point Likert scale (1=never, 5=very often).  
46  
47  
48  
49  
50  
51

52 Other questions asked for physicians' perceptions of their own employability (2 items measured  
53  
54 ability: "*I am [physically (item 1)/ mentally (item 2)] able to continue to work until the age of 67 in*  
55  
56 *my current profession*"; 1 item measured willingness: "*I am willing to continue to work until the age*  
57  
58 *of 67 in my current profession*", [36]). This is a common way to measure employability, which is also  
59  
60

1  
2  
3 used in a big survey research among employees in the Netherlands called the NEA (abbreviation for  
4  
5 ‘Nederlandse Enquête Arbeidsomstandigheden’, translation: Dutch Survey on Work conditions). Job  
6  
7 satisfaction and career satisfaction were both measured with 1 item (“*Generally speaking, I am very*  
8  
9 *satisfied with my job*” [37] and “*Generally speaking, I am very satisfied with my career*” [38]).

10  
11 Previous studies have shown that a single item measure of job satisfaction is appropriate especially  
12  
13 when situational constraints limit or prevent the use of scales [37]. Answers were given on a 5-point  
14  
15 Likert scale (1=totally disagree, 5=totally agree).

16  
17  
18  
19  
20 The surveys sent on T2 and T3 additionally asked for perceived stress associated with the Covid-19  
21  
22 situation. This was measured with items that are relevant for employees working during the Covid-19  
23  
24 pandemic. Some specifically related to the work of health care workers as they may experience stress  
25  
26 due to the health of their patients or colleagues who have a higher risk of infection (10 newly-  
27  
28 developed items: “*How often do you experience stress caused by Covid-19 [for work (item 1)/ about*  
29  
30 *the measures taken against Covid-19 (item 2)/ for your work-life balance (item 3)/ messages in the*  
31  
32 *media (item 4)/ yourself (item 5)/ love ones (item 6)/ your patients (item 7)/ your colleagues (item 8)/*  
33  
34 *the hospital where you work (item 9)/ the profession of physicians*” (item 10)], that were all rated on a  
35  
36 5-point Likert scale (1=never, 5=very often)).

37  
38  
39  
40  
41 The University Medical Center Utrecht confirmed that this study fell outside the scope of the Dutch  
42  
43 Law on Medical Research (WMO) and therefore formal ethical approval was not required (METc  
44  
45 2019, 20/328).

### 46 47 48 49 **Patient and public involvement**

50  
51 This study was conducted among physicians; patients were not involved in this study. Physicians were  
52  
53 involved in developing the surveys that were used in this study. The survey was pilot-tested among  
54  
55 five physicians. They were interviewed about the content, wording, and style of addressing physicians  
56  
57 in the survey. If needed, the content and the item wordings were adapted. Furthermore, the researchers  
58  
59 of this study developed the surveys and interpreted results with the support of a senior board member,  
60

and two physicians, one from the academic and one from the general hospital. The outcomes of this study are discussed in both hospitals in a group of representative physicians from all departments.

### Data analysis

To examine physicians' employability, a repeated measures analyses of variance (RM ANOVA) was performed with planned contrasts on Time (Helmert contrasts T1 vs. T2/T3) and with Time as a within-subject factor and Group as a between-subject factor.

Furthermore, one-way ANOVAs were performed to compare groups (physicians with surgical, medical or another specialty) and work experiences over time (T1, T2 and T3).

### Results

Table 1 presents the demographics of the respondents.

Table 1: Demographics of participants (n=75)

|                                                     |                                                                                                                                      |
|-----------------------------------------------------|--------------------------------------------------------------------------------------------------------------------------------------|
| <b>Gender</b>                                       | Male: n=28 (37%)<br>Female: n=47 (63%)                                                                                               |
| <b>Age</b>                                          | M=44.9, SD=7.8                                                                                                                       |
| <b>Work hours according to contract</b>             | M=41.4, SD=11.12                                                                                                                     |
| <b>Occupational tenure (years)</b>                  | M=11.6, SD=8.4                                                                                                                       |
| <b>Organizational tenure (years)</b>                | M=9.6, SD=8.0                                                                                                                        |
| <b>Type of employment contract</b>                  | Self-employed: n=10 (13%)<br>Contracted: n=65 (87%)                                                                                  |
| <b>Specialty</b>                                    | Surgical: n=14 (19%)<br>Medical: n=35 (47%)<br>Other: n=26 (35%)                                                                     |
| <b>Involved in care for Covid-19 patients at T2</b> | Yes: n=24 (32%), of which n=6 (25%) had a surgical specialty, n=13 (54%) had a medical specialty and n=5 (21%) had another specialty |

|                                                     |                                                                                                                                                                  |
|-----------------------------------------------------|------------------------------------------------------------------------------------------------------------------------------------------------------------------|
|                                                     | No: $n=51$ (68%)                                                                                                                                                 |
| <b>Involved in care for Covid-19 patients at T3</b> | Yes: $n=19$ (25%), of which $n=4$ (21%) had a surgical specialty, $n=10$ (53%) had a medical specialty and $n=5$ (26%) had another specialty<br>No: $n=56$ (75%) |

### Employability is higher during the Covid-19 pandemic than before

RM ANOVAs show that physicians' perceived employability significantly increased over time (Figure 2). Specifically, physicians' mental and physical ability to work and to continue working in their current profession significantly increased from the time before the Covid-19 pandemic (T1) compared to the period during the Covid-19 pandemic (T2 and T3) ( $F(1,67)=4.954$ ,  $p=0.029^*$ , *partial*  $\eta^2=0.069$ ). Similarly, physicians' willingness to work and to continue to work significantly increases from the time before the pandemic compared to the period during the pandemic ( $F(1,65)=11.125$ ,  $p=0.001^{**}$ , *partial*  $\eta^2=0.146$ ).

**Please insert: Figure 2: Mean scores for employability on T1, T2 and T3**

We observe a similar significant increase in physicians' career satisfaction from prior to the Covid-19 pandemic (T1) to during the Covid-19 pandemic (T2 and T3) ( $F(1,72)=6.294$ ,  $p=0.014^*$ , *partial*  $\eta^2=0.080$ ). No significant change was found for physicians' job satisfaction in this period. Moreover, no significant differences were found in the employability, job and career satisfaction for physicians who were involved in taking care for patients infected with the Covid-19 virus and physicians that were not involved in Covid-19 related care.

### Employability differs between specialties

Further analyses show that employability differs among physicians with surgical, medical and other specialties (Figure 3). At T1, surgical doctors are significantly less positive about their employability than physicians with medical or other specialties (ability:  $F(2,71)=6.412$ ,  $p=0.003^{**}$ , *partial*  $\eta^2=0.153$ ; willingness  $F(2,68)=4.200$ ,  $p=0.019^*$ , *partial*  $\eta^2=0.110$ ). Further, during the first phase of

the Covid-19 pandemic (T2), the employability of surgical doctors is still significantly lower than that of physicians with medical or other specialties (ability:  $F(2,70)=6.492, p=0.003^{**}$ , partial  $\eta^2=0.156$ ; willingness:  $F(2,71)=5.941, p=0.004^{**}$ , partial  $\eta^2=0.143$ ). At T3 there are no significant differences anymore between the employability of the three groups of medical specialties. Table 2 summarizes the differences in employability over time among physicians with surgical, medical, and other specialties.

Please insert: Figure 3: Mean scores for employability on T1, T2 and T3 for physicians with surgical, medical and other specialties

Table 2: Results one-way ANOVAs employability on T1, T2 and T3 for physicians with surgical, medical and other specialties (n=75)

| Variable                        | Time | Surgical |      | Medical |      | Other |      | F-values                      | Partial $\eta^2$ |
|---------------------------------|------|----------|------|---------|------|-------|------|-------------------------------|------------------|
|                                 |      | M        | SD   | M       | SD   | M     | SD   |                               |                  |
| Ability to continue working     | T1   | 3.00     | 1.22 | 3.83    | 0.79 | 3.96  | 0.64 | $F(2,71)=6.412, p=0.003^{**}$ | 0.153            |
|                                 | T2   | 3.18     | 1.05 | 3.88    | 0.81 | 4.10  | 0.52 | $F(2,70)=6.492, p=0.003^{**}$ | 0.156            |
|                                 | T3   | 3.64     | 1.08 | 3.91    | 0.96 | 4.13  | 0.71 | $F(2,69)=1.256, p=0.291$      | X                |
| Willingness to continue working | T1   | 2.08     | 1.26 | 3.17    | 1.22 | 3.00  | 1.04 | $F(2,68)=4.200, p=0.019^*$    | 0.110            |
|                                 | T2   | 2.29     | 1.07 | 3.38    | 0.99 | 3.12  | 0.99 | $F(2,71)=5.941, p=0.004^{**}$ | 0.143            |
|                                 | T3   | 3.00     | 1.24 | 3.39    | 1.20 | 3.42  | 1.06 | $F(2,70)=0.700, p=0.500$      | X                |

\*=significant at the 0.05 level (2-tailed), \*\* significant at the 0.01 level (2-tailed)

### Physicians' work experiences during the Covid-19 pandemic

We further examined how physicians experience their work during the Covid-19 pandemic. Table 3 shows that physicians experience a significant lower emotional workload ( $F(2,70)=10.579$ ,  $p<0.001^{**}$ ), physical workload ( $F(2,72)=5.159$ ,  $p=0.008^{**}$ ), and quantitative workload ( $F(2,62)=5.702$ ,  $p=0.005^{**}$ ) during an early phase of the Covid-19 pandemic (T2), compared to the time before the pandemic (T1). In a later phase of the pandemic (T3), the experience of workload showed a tendency to return to the pre-pandemic levels (T1) (Figure 4). There were no significant differences in the experiences of these work characteristics for physicians who were involved in Covid-19 related care and physicians who were not.

*Please insert: Figure 4: Mean scores for work characteristics on T1, T2 and T3*

Table 3: Results one-way ANOVAs experience of work characteristics on T1, T2 and T3 (n=75)

| Work characteristics  | T1   |      | T2   |      | T3   |      | F-values                             | $\eta^2$ |
|-----------------------|------|------|------|------|------|------|--------------------------------------|----------|
|                       | M    | SD   | M    | SD   | M    | SD   |                                      |          |
| Emotional workload    | 2.70 | 0.67 | 2.45 | 0.63 | 2.51 | 0.67 | $F(2,70)=10.579$ ,<br>$p<0.001^{**}$ | 0.232    |
| Physical workload     | 2.61 | 0.98 | 2.34 | 0.93 | 2.65 | 0.99 | $F(2,72)=5.159$ ,<br>$p=0.008^{**}$  | 0.125    |
| Quantitative workload | 3.45 | 1.11 | 2.99 | 1.03 | 3.22 | 1.11 | $F(2,62)=5.702$ ,<br>$p=0.005^{**}$  | 0.155    |
| Job autonomy          | 3.82 | 0.80 | 3.64 | 0.54 | 3.76 | 0.60 | $F(2,63)=2.417$ ,<br>$p=0.097$       | x        |

\*=significant at the 0.05 level (2-tailed), \*\* significant at the 0.01 level (2-tailed)

### Stress factors during the Covid-19 pandemic

Physicians further reported to what extent they experience stress in several areas because of the Covid-19 pandemic (Figure 5). During an early phase of this pandemic (T2), physicians experienced the most stress from combining work and private life ( $M=2.63$ ;  $SD=1.27$ ), from work in general ( $M=2.49$ ;

1  
2  
3  $SD=0.95$ ) and due to the possible impact of Covid-19 on their loved ones' health ( $M=2.33$ ;  $SD=0.93$ ).  
4  
5 They experienced the least stress for the possible consequences of Covid-19 for themselves ( $M=1.85$ ;  
6  
7  $SD=0.85$ ). During a later phase of the Covid-19 pandemic (T3), physicians reported to experience the  
8  
9 most stress from their work in general ( $M=2.55$ ;  $SD=1.00$ ), from combining work and private life  
10  
11 ( $M=2.47$ ;  $SD=1.12$ ), and due to the health of their patients ( $M=2.38$ ;  $SD=0.98$ ). Again, they reported to  
12  
13 experience the least stress for the possible impact of Covid-19 on themselves ( $M=2.03$ ;  $SD=0.72$ ).  
14  
15  
16  
17

18 **Please insert: Figure 5: Mean scores on how often physicians experience stress in several areas on T2**  
19 **and T3 caused by Covid-19**  
20  
21  
22  
23

## 24 Discussion

25  
26 The aim of this study was to provide insight into the impact of the Covid-19 pandemic on physicians'  
27  
28 employability and work experiences. A longitudinal approach was used, which allowed us to compare  
29  
30 physicians work experiences during the Covid-19 pandemic with the situation prior to the pandemic.  
31  
32  
33  
34

35 Perhaps the most interesting finding of the present study was the fact that the perceived employability  
36  
37 of physicians was significantly *higher* during the pandemic than it was before. Specifically, the results  
38  
39 show that physicians' employability increases in the time prior to the Covid-19 pandemic to the early  
40  
41 phase of the Covid-19 pandemic and continues to increase in a later phase of the Covid-19 pandemic.  
42  
43 This goes contrary to our expectations, since other studies found that physicians' work motivation  
44  
45 decreases [10] and stress and burn-out increase during previous pandemics [11,12]. There are various  
46  
47 substantive explanations for this increase in employability. It could be related to a change in  
48  
49 physicians' work characteristics, or an increase in societal appreciation of health care professionals  
50  
51 during the pandemic. This study shows that physicians experienced a lower workload during an early  
52  
53 phase of the Covid-19 pandemic compared to the time prior to the pandemic. Workload has also been  
54  
55 shown to correlate with employability. Therefore, a lower workload at this time could possibly explain  
56  
57 why physicians perceive to be better able to continue working until their retirement. This is in line  
58  
59 with research showing that job demands, such as workload, negatively relate to well-being and self-  
60



1  
2  
3 reported health [e.g. 15]. This suggests that having a period of lower job demands may be beneficial  
4 for an individual's well-being or related concepts such as employability. More research is needed to  
5 examine this further.  
6  
7

8  
9 More appreciation for physicians' work by society [9] may provide an alternative explanation  
10 for the increase in their employability. Physicians and other health care workers have been portrayed  
11 as 'heroes' [39], and citizens have expressed their support through a public applause and by placing  
12 white t-shirts with red hearts in front of their windows. Physicians are on the shortlist of 'vital  
13 professions', which gives them certain privileges during the pandemic compared to people with other  
14 professions (e.g. they may use public transport and their children can still go to daycare and school).  
15 This might have resulted in physicians feeling highly appreciated during the Covid-19 pandemic,  
16 which may have boosted their ability and willingness to work and to continue their essential and  
17 meaningful work.  
18  
19  
20  
21  
22  
23  
24  
25  
26  
27  
28  
29

30 A possible explanation for the different conclusions drawn in this study compared to other studies on  
31 the impact of previous pandemics [10-12] may be the result of a different approach taken in our study  
32 compared to these past studies. Earlier studies drew conclusions on the basis of cross-sectional,  
33 retrospective data. Recall biases are inherent to studies using retrospective techniques to understand a  
34 change in experience over time [29]. Studies have shown that when respondents have reason to believe  
35 in change, they will report change when they are asked to reflect on the past, even if no change has  
36 occurred [29]. In a crisis situation, such as a pandemic, respondents may believe that they were more  
37 positive before the outbreak of a pandemic than during the pandemic. This perspective is likely to be  
38 strengthened by the public debate where the negative impact of the pandemic on health care workers  
39 has frequently been emphasized. A strength of our study is that we used real-time data collection,  
40 instead of retrospective methods. We asked physicians about things that they *can* report, namely their  
41 current experiences at the moment of taking the survey, i.e. they reported on their current feelings, not  
42 on their perceptions of their feelings in the past. This approach allows for drawing considerably more  
43 reliable conclusions about physicians' work experiences prior to a pandemic and during a pandemic  
44 than is possible using non-longitudinal methodologies.  
45  
46  
47  
48  
49  
50  
51  
52  
53  
54  
55  
56  
57  
58  
59  
60

1  
2  
3  
4  
5 Physicians employability differed across surgical, medical and other specialties. This difference is also  
6  
7 apparent before the Covid-19 pandemic. This is in line with previous studies showing that physicians  
8  
9 with different specialties experience their work differently. There are for instance significant  
10  
11 differences in job stressors, demands and resources among medical specialties [e.g. 40]. Another  
12  
13 interesting finding is that the employability of physicians with surgical specialties increased stronger  
14  
15 from the time prior to the Covid-19 pandemic to the time during the Covid-19 pandemic compared to  
16  
17 physicians with medical or other specialties. We tested whether this difference is caused by the degree  
18  
19 of involvement with care for Covid-19 patients, but this was not the case. Other factors might explain  
20  
21 this difference. Physicians with different specialties had very diverse roles during the Covid-19  
22  
23 pandemic. While some physicians were directly involved in taking care for Covid-19 patients, or were  
24  
25 part of crisis teams, making very long workdays, other physicians work was significantly reduced due  
26  
27 to postponed or cancelled non-Covid related care [41]. Therefore, the job demands of physicians with  
28  
29 different specialties varied during the Covid-19 pandemic. For example, job demands for physicians  
30  
31 with surgical specialties could be lower during the Covid-19 pandemic as they saw their work being  
32  
33 reduced due to the cancellations of operations. This could have reduced their (physical) workload  
34  
35 more strongly than the workload of physicians with medical or other specialties which could explain  
36  
37 the rise in their employability.  
38  
39  
40  
41

## 42 **Limitations**

43  
44 This study has some limitations. First, although a longitudinal approach is highly relevant to  
45  
46 understanding the impact of a pandemic over time, the disadvantage of this approach is a high attrition  
47  
48 rate of participants. In this study, around one third of the participants did not complete all three  
49  
50 surveys and were therefore excluded from the analyses. It is possible that nonresponders differed from  
51  
52 responders, for example in terms of workload. However, non-significant non-response analyses show  
53  
54 that it is unlikely that this has biased our results. Future studies in larger samples with low attrition  
55  
56 rate, would enhance the generalizability of the findings.  
57  
58  
59  
60

1  
2  
3 Second, some questions in this study might generate a recall bias as they ask for past  
4 situations, for instance in the items measuring emotional workload asking for the existence of  
5 emotionally demanding past situations. We believe that this bias is limited, as we did not use  
6 retrospective questions in this study. Further, research has shown that people are usually able to  
7 remember long-term periods or specific events, such as the Covid-19 pandemic [29].  
8  
9  
10  
11  
12  
13  
14

### 15 **Study implications**

16  
17 This study contributes to the body of knowledge about the psychological impact of the Covid-19  
18 pandemic on health care workers. It shows that the Covid-19 pandemic does not necessarily affect  
19 health care workers negatively; rather, it may also result in positive outcomes (i.e. increasing  
20 employability). As physicians work experiences are dynamic, a longitudinal approach is necessary to  
21 capture the dynamics of a pandemic on physicians work experiences. Furthermore, this study is  
22 valuable to practice as the healthcare system's ability to cope during an influenza pandemic will  
23 depend, to a large extent, on the number of health care workers, including physicians, who are able  
24 and willing to work through the crisis [8]. This study can inform global health actors that develop  
25 human resource strategies for dealing with the aftermath of the Covid-19 outbreak on health care  
26 workers. This study shows that physicians with surgical, medical and other specialties experience the  
27 Covid-19 pandemic differently. Therefore, tailor-made human resource strategies seem appropriate  
28 that pay attention to the specific needs of individual physicians.  
29  
30  
31  
32  
33  
34  
35  
36  
37  
38  
39  
40  
41  
42  
43  
44  
45

### 46 **Conclusion**

47 This is the first study to provide evidence on the effects of the Covid-19 pandemic on physicians'  
48 employability and work experience, using a longitudinal approach with real-time data at three  
49 moments in time. We found evidence that physicians' employability significantly increased from the  
50 time prior to the pandemic to the period during the Covid-19 pandemic. Also, physicians experience a  
51 lower workload during the first peak of the Covid-19 pandemic compared to the time before the  
52 pandemic. At a later phase in the pandemic, their experiences of workload bounce back to initial  
53 levels. These results show that employability and work experiences vary, not only over time, but also  
54  
55  
56  
57  
58  
59  
60

1  
2  
3 in different phases of the Covid-19 pandemic. Physicians further experience the most stress from the  
4  
5 impact of Covid-19 on their work in general and from combining work and private life.  
6  
7  
8

#### 9 **Footnotes**

10  
11 **Funding:** This research received no specific grant from any funding agency in the public, commercial  
12  
13 or not-for-profit sectors.  
14

15  
16 **Competing interests:** None declared.

17  
18 **Patient and public involvement:** Patients and/or the public were not involved in the design, or  
19  
20 conduct, or reporting, or dissemination plans of this research. The survey was co-constructed with the  
21  
22 authors, some of them work within the hospital. The survey was also pilot tested with physicians who  
23  
24 gave feedback on it.  
25

26  
27 **Patient consent for publication:** Not required.

28  
29 **Ethics approval:** The Ethical Committee of the University Medical Center Utrecht confirmed that this  
30  
31 study falls outside the scope of the Dutch Law on Medical Research (WMO) and therefore formal  
32  
33 ethical approval was not required (METc 2019, 20/328).

34  
35 **Data availability statement:** Raw data are available upon reasonable request. Ethical restrictions  
36  
37 related to participant confidentiality prohibit the authors from making the dataset publicly available.

38  
39 **Authors' contributions:** All authors conceptualized the research project. EvL coordinated the study  
40  
41 and gathered participants. EvL analyzed the data and drafted the manuscript. All authors reviewed and  
42  
43 provided comments and revisions. TT, EvR, JWL and EK secured funding for the project. All authors  
44  
45 read and approved the final manuscript.  
46  
47  
48  
49  
50  
51  
52  
53  
54  
55  
56  
57  
58  
59  
60

## References

- 1 Pappa S, Ntella V, Giannakas T, Giannakoulis VG, Papoutsis E, Katsaounou P. Prevalence of depression, anxiety, and insomnia among healthcare workers during the COVID-19 pandemic: A systematic review and meta-analysis. *Brain, behavior, and Immunity* 2020;**88**:901-907. doi:[10.1016/j.bbi.2020.05.026](https://doi.org/10.1016/j.bbi.2020.05.026)
- 2 Ripp J, Peccoralo L, Charney D. Attending to the emotional well-being of the health care workforce in a New York city health system during the Covid-19 pandemic. *Acad Med* 2020;**64**:1–4. doi:10.1097/ACM.0000000000003414
- 3 Smith CC. The structural vulnerability of healthcare workers during COVID-19: Observations on the social context of risk and the equitable distribution of resources. *Soc Sci Med* 2020;**258**:1–4. doi:10.1016/j.socscimed.2020.113119
- 4 Pfefferbaum B, North CS. Mental health and the Covid-19 pandemic. *N Engl J Med* Published Online First: 2020. doi:10.1056/NEJMp2008017
- 5 Cooch N. The psychological impact of Covid-19 on physicians: Lessons from previous outbreaks. 02-06-2020. 2020.<https://www.practiceupdate.com/content/the-psychological-impact-of-covid-19-on-physicians-lessons-from-previous-outbreaks/100995/45?trendmd-shared=0> (accessed 9 Jul 2020).
- 6 Fargen KM, Leslie-Mazwi TM, Klucznik RP, *et al.* The professional and personal impact of the coronavirus pandemic on US neurointerventional practices: a nationwide survey The Pandemic and Neurointervention. *J Neurointerv Surg* 2020;**12**. doi:10.1136/neurintsurg-2020-016513
- 7 Lai J, Ma S, Wang Y, *et al.* Factors associated with mental health outcomes among health care workers exposed to coronavirus disease 2019. *JAMA Netw Open* 2020;**3**:1–12. doi:10.1001/jamanetworkopen.2020.3976
- 8 Ives J, Greenfield S, Parry JM, *et al.* Healthcare workers' attitudes to working during

- 1  
2  
3 pandemic influenza: a qualitative study. *BMC Public Health* 2009;**9**:1–13.  
4  
5 doi:10.1186/1471-2458-9-56  
6  
7  
8 9 Vindrola-Padros C, Andrews L, Dowrick A, *et al.* Perceptions and experiences of  
9  
10 healthcare workers during the COVID-19 pandemic in the UK. *BMJ Open* 2020;**10**:1–  
11  
12 8. doi:10.1136/BMJOPEN-2020-040503  
13  
14  
15 10 Imai H, Matsuishi K, Ito A, *et al.* Factors associated with motivation and hesitation to  
16  
17 work among health professionals during a public crisis: a cross sectional study of  
18  
19 hospital workers in Japan during the pandemic (H1N1) 2009. *BMC Public Health*  
20  
21 2010;**10**:1–8. doi:10.1186/1471-2458-10-672  
22  
23  
24 11 Liu X, Kakade M, Fuller CJ, *et al.* Depression after exposure to stressful events:  
25  
26 lessons learned from the severe acute respiratory syndrome epidemic. *Compr*  
27  
28 *Psychiatry* 2012;**53**. doi:10.1016/j.comppsy.2011.02.003  
29  
30  
31 12 Maunder RG, Lancee WJ, Balderson KE, *et al.* Long-term psychological and  
32  
33 occupational effects of providing hospital healthcare during SARS outbreak. *Emerging*  
34  
35 *Infect Dis* 2006;**12**:1924–32. doi:10.3201/eid1212.060584  
36  
37  
38 13 Bakker AB, Van Veldhoven M, Xanthopoulou D. Beyond the demand-control model. *J*  
39  
40 *Pers Psychol* 2010;**9**:3–16. doi:10.1027/1866-5888/a000006  
41  
42  
43 14 Karasek RA. Job demands, job decision latitude, and mental strain: Implications for job  
44  
45 redesign. *Adm Sci Q* 1979;**24**:285–  
46  
47 308. [https://www.jstor.org/stable/pdf/2392498.pdf?casa\\_token=Lv7e61ddZFkAAAAA:](https://www.jstor.org/stable/pdf/2392498.pdf?casa_token=Lv7e61ddZFkAAAAA:cDIPyGRTkgjcINSmVIIVUYGHt0E2srz5VXhj13ak28KDkdFVZRDUx-g9yeZF8Vm3XAAAdRPJQ5z3Mh-opCYGqlqZIK-GjAajHupaW4G1TQUayGhs9IIua)  
48  
49 [cDIPyGRTkgjcINSmVIIVUYGHt0E2srz5VXhj13ak28KDkdFVZRDUx-](https://www.jstor.org/stable/pdf/2392498.pdf?casa_token=Lv7e61ddZFkAAAAA:cDIPyGRTkgjcINSmVIIVUYGHt0E2srz5VXhj13ak28KDkdFVZRDUx-g9yeZF8Vm3XAAAdRPJQ5z3Mh-opCYGqlqZIK-GjAajHupaW4G1TQUayGhs9IIua)  
50  
51 [g9yeZF8Vm3XAAAdRPJQ5z3Mh-opCYGqlqZIK-GjAajHupaW4G1TQUayGhs9IIua](https://www.jstor.org/stable/pdf/2392498.pdf?casa_token=Lv7e61ddZFkAAAAA:cDIPyGRTkgjcINSmVIIVUYGHt0E2srz5VXhj13ak28KDkdFVZRDUx-g9yeZF8Vm3XAAAdRPJQ5z3Mh-opCYGqlqZIK-GjAajHupaW4G1TQUayGhs9IIua)  
52  
53 (accessed 15 Feb 2021).  
54  
55  
56 15 De Lange AH, Taris TW, Kompier MAJ, *et al.* The very best of the millennium:  
57  
58 longitudinal research and the Demand-Control-(Support) Model. *J Occup Health*  
59  
60

- 1  
2  
3 *Psychol* 2003;**8**:282–305. doi:10.1037/1076-8998.8.4.282  
4  
5  
6 16 De Cuyper N, Sulea C, Philippaers K, *et al*. Perceived employability and performance:  
7  
8 moderation by felt job insecurity. *Pers Rev* 2014;**43**:536–52. doi:10.1108/PR-03-2013-  
9  
10 0050  
11  
12 17 Kirves K, Kinnunen U, De Cuyper N, *et al*. Trajectories of perceived employability  
13  
14 and their associations with well-being at work. *J Pers Psychol* 2014;**13**:46–57.  
15  
16 doi:10.1027/1866-5888/a000103  
17  
18  
19 18 Akkermans J, Seibert SE, Mol ST. Tales of the unexpected. Integrating career shocks  
20  
21 in the contemporary career literature. *SA J Ind Psychol* 2018;**44**:1–10.  
22  
23 doi:10.4102/sajip.v44i0.1503  
24  
25  
26 19 Akkermans J, Richardson J, Kraimer ML. The Covid-19 crisis as a career shock:  
27  
28 Implications for careers and vocational behavior. *J Vocat Behav* 2020;**119**:1–5.  
29  
30 doi:10.1016/J.JVB.2020.103434  
31  
32  
33 20 Wallace JE, Lemaire JB, Ghali WA. Physician wellness: A missing quality indicator.  
34  
35 *Lancet* 2009;**374**:1714–21. doi:10.1016/S0140-6736(09)61424-0  
36  
37  
38 21 Maunder R. The experience of the 2003 SARS outbreak as a traumatic stress among  
39  
40 frontline healthcare workers in Toronto: lessons learned. *Philos Trans R Soc London*  
41  
42 2004;**359**:1117–25. doi:10.1098/rstb.2004.1483  
43  
44  
45 22 Naushad VA, Bierens JJ, Nishan KP, *et al*. A systematic review of the impact of  
46  
47 disaster on the mental health of medical responders. *Prehosp Disaster Med*  
48  
49 2019;**34**:632–43. doi:10.1017/S1049023X19004874  
50  
51  
52 23 Wu Y, Wang J, Luo C, *et al*. A comparison of burnout frequency among oncology  
53  
54 physicians and nurses working on the frontline and usual wards during the COVID-19  
55  
56 epidemic in Wuhan, China. *Journal of pain and symptom management* 2020;**60**:e60-  
57  
58 e65. doi:10.1016/j.jpainsyman.2020.04.008  
59  
60

- 1  
2  
3 24 Tiete J, Guatteri M, Lachaux A, Matossian A, Hougardy JM, Loas G, Rotsaert M.  
4  
5 Mental health outcomes in healthcare workers in COVID-19 and non-COVID-19 care  
6  
7 units: a cross-sectional survey in Belgium. *Frontiers in Psychol* 2020;**11**:1-10.  
8  
9 doi:10.3389/fpsyg.2020.612241  
10  
11  
12 25 Willan J, King AJ, Jeffery K, *et al.* Challenges for NHS hospitals during Covid-19  
13  
14 epidemic. *BMJ* 2020;**368**:1–2. doi:10.1136/bmj.m1117  
15  
16  
17 26 Tan, B. Y., Chew, N. W., Lee, G. K., Jing, M., Goh, Y., Yeo, L. L., ... & Shanmugam  
18  
19 GN. Psychological impact of the Covid-19 pandemic on health care workers in  
20  
21 Singapore. *Ann Intern Med* 2020;:1–3. doi:10.7326/M20-1083  
22  
23  
24 27 Chong MY, Wang WC, Hsieh WC, *et al.* Psychological impact of severe acute  
25  
26 respiratory syndrome on health workers in a tertiary hospital. *Br J Psychiatry*  
27  
28 2004;**185**:127–33.  
29  
30  
31 28 Preti E, Di Mattei V, Perego G, *et al.* The psychological impact of epidemic and  
32  
33 pandemic outbreaks on healthcare workers: rapid review of the evidence. *Curr*  
34  
35 *Psychiatry Rep* 2020;**22**:1–22. doi:10.1007/s11920-020-01166-z  
36  
37  
38 29 Schwarz N. Retrospective and concurrent self-reports: The rationale for real-time data  
39  
40 capture. In: Stone A, Shiffman SS, Atienza A, *et al.*, eds. *The science of real-time data*  
41  
42 *capture: Self-reports in health research*. New York: : Oxford University Press 2007.  
43  
44 11–26.[https://dornsife.usc.edu/assets/sites/780/docs/schwarz\\_retrospective\\_self-](https://dornsife.usc.edu/assets/sites/780/docs/schwarz_retrospective_self-reports_mdc_2007.pdf)  
45  
46 [reports\\_mdc\\_2007.pdf](https://dornsife.usc.edu/assets/sites/780/docs/schwarz_retrospective_self-reports_mdc_2007.pdf)  
47  
48  
49 30 Van Leeuwen, E. H., Knies, E., Van Rensen, E. L. J., Taris TW. Stimulating perceived  
50  
51 ability and willingness to continue working and job crafting behaviour of physicians:  
52  
53 An intervention study. In: *Dutch HRM Network Conference*. Tilburg: 2019.  
54  
55  
56 31 RIVM. Current information about Covid-19. [https://www.rivm.nl/en/coronavirus-](https://www.rivm.nl/en/coronavirus-covid-19/current-information)  
57  
58 [covid-19/current-information](https://www.rivm.nl/en/coronavirus-covid-19/current-information). Retrieved on 13<sup>th</sup> of July 2021.  
59  
60



- 1  
2  
3 32 Blank, J. L. T., Niaounakis TK. Productiviteitsontwikkelingen bij medisch specialisten:  
4 Resultaten en technische rapportage. Delft: 2019.  
5  
6  
7  
8 33 Van Veldhoven, M., Prins, J., Van der Laken, P., Dijkstra L. *VBBA 2.0: Update van de*  
9 *standaard voor vragenlijstonderzoek naar werk, welbevinden en prestaties*. Enschede:  
10 Gildeprint 2014.  
11  
12  
13  
14 34 Morgeson FP, Humphrey SE. The work design questionnaire (WDQ): Developing and  
15 validating a comprehensive measure for assessing job design and the nature of work. *J*  
16 *Appl Psychol* 2006;**91**:1321–39. doi:10.1037/0021-9010.91.6.1321  
17  
18  
19  
20 35 Demerouti E, Le Blanc PM, Bakker AB, *et al*. Present but sick: a three-wave study on  
21 job demands, presenteeism and burnout. *Career Dev Int* 2009;**14**:50–68.  
22 doi:10.1108/13620430910933574  
23  
24  
25  
26 36 Oude Hengel KM, Blatter BM, Geuskens GA, *et al*. Factors associated with the ability  
27 and willingness to continue working until the age of 65 in construction workers. *Int*  
28 *Arch Occup Environ Health* 2012;**85**:783–90. doi:10.1007/s00420-011-0719-3  
29  
30  
31  
32 37 Wanous JP, Reichers AE, Hudy MJ. Overall job satisfaction: How good are single-item  
33 measures? *J Appl Psychol* 1997;**82**:247–52. doi:10.1037/0021-9010.82.2.247  
34  
35  
36  
37 38 Martins LL, Eddleston KA, Veiga JF. Moderators of the relationship between work-  
38 family conflict and career satisfaction. *Acad Manag J* 2002;**45**:399–409.  
39 doi:10.5465/3069354  
40  
41  
42  
43 39 Van Dooren W, Noordegraaf M. Staging science: Authoritativeness and fragility of  
44 models and measurement in the Covid-19 crisis. *Public Adm Rev* 2020;**80**:610–5.  
45 doi:10.1111/puar.13219  
46  
47  
48  
49 40 Bernburg M, Vitzthum K, Groneberg DA, *et al*. Physicians' occupational stress,  
50 depressive symptoms and work ability in relation to their working environment: a  
51 cross-sectional study of differences among medical residents with various specialties  
52  
53  
54  
55  
56  
57  
58  
59  
60

1  
2  
3 working in German hospitals. *BMJ Open* 2016;**6**:1–9. doi:10.1136/BMJOPEN-2016-  
4  
5 011369

6  
7  
8 41 Fowler A, Abbott TEF, Pearse RM. Can we safely continue to offer surgical treatments  
9  
10 during the COVID-19 pandemic? *BMJ Qual Saf* Published Online First: 20 November  
11  
12 2020. doi:10.1136/BMJQS-2020-012544  
13  
14  
15  
16  
17  
18  
19  
20  
21  
22  
23  
24  
25  
26  
27  
28  
29  
30  
31  
32  
33  
34  
35  
36  
37  
38  
39  
40  
41  
42  
43  
44  
45  
46  
47  
48  
49  
50  
51  
52  
53  
54  
55  
56  
57  
58  
59  
60

For peer review only

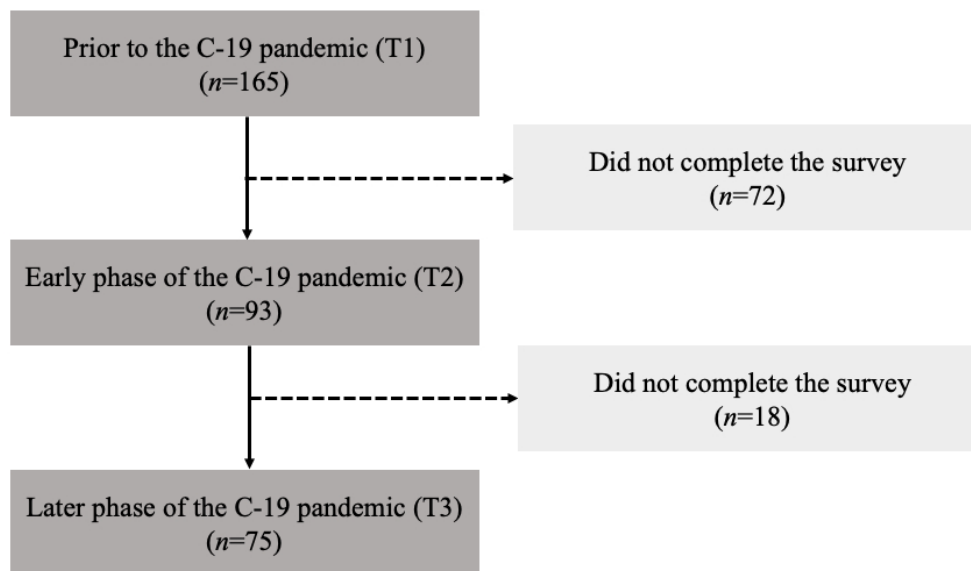

Figure 1: Flow chart of participants at T1, T2 and T3

303x177mm (72 x 72 DPI)

1  
2  
3  
4  
5  
6  
7  
8  
9  
10  
11  
12  
13  
14  
15  
16  
17  
18  
19  
20  
21  
22  
23  
24  
25  
26  
27  
28  
29  
30  
31  
32  
33  
34  
35  
36  
37  
38  
39  
40  
41  
42  
43  
44  
45  
46  
47  
48  
49  
50  
51  
52  
53  
54  
55  
56  
57  
58  
59  
60



Figure 2: Mean scores for employability on T1, T2 and T3

294x186mm (59 x 59 DPI)

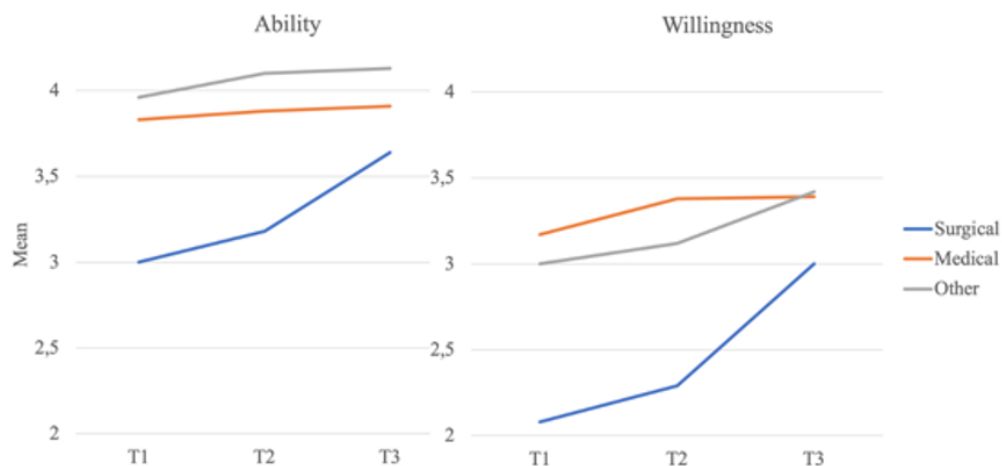

Figure 3: Mean scores for employability on T1, T2 and T3 for physicians with surgical, medical and other specialties

370x170mm (59 x 59 DPI)

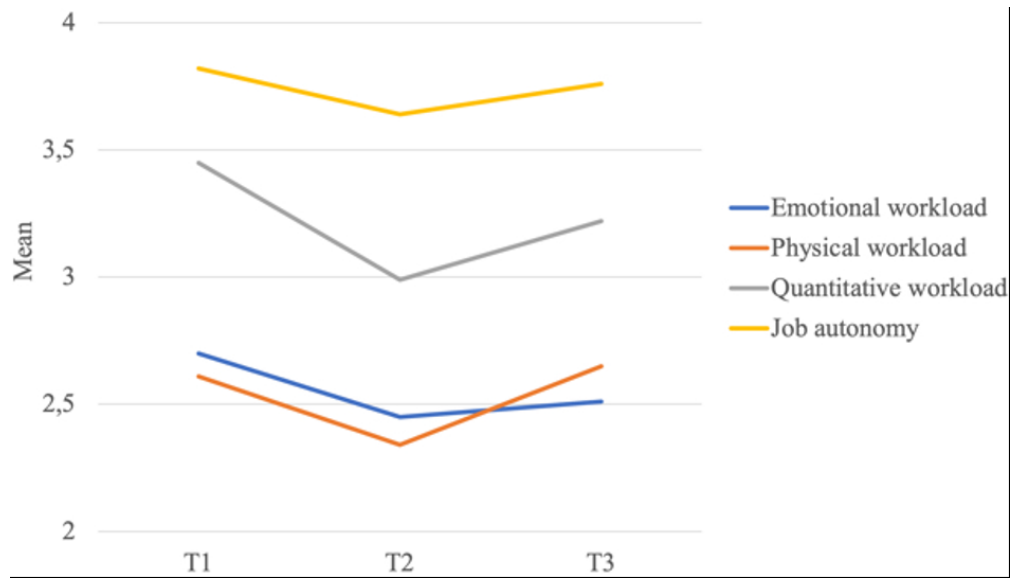

Figure 4: Mean scores for work characteristics on T1, T2 and T3

406x232mm (59 x 59 DPI)

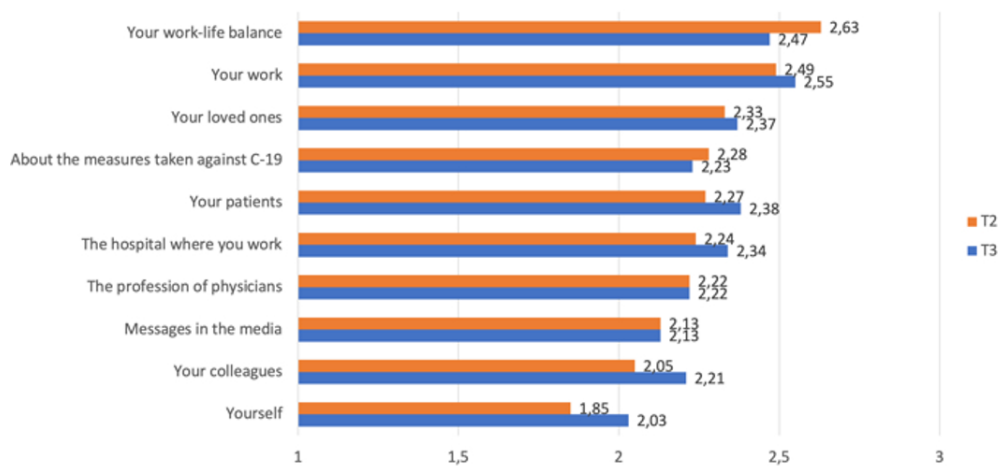

Figure 5: Mean scores on how often physicians experience stress in several areas on T2 and T3 caused by Covid-19

459x213mm (59 x 59 DPI)

STROBE Statement—Checklist of items that should be included in reports of *cohort studies*

|                           | Item No | Recommendation                                                                                                                                                                                                                                                                                                                                                                                                                           |
|---------------------------|---------|------------------------------------------------------------------------------------------------------------------------------------------------------------------------------------------------------------------------------------------------------------------------------------------------------------------------------------------------------------------------------------------------------------------------------------------|
| <b>Title and abstract</b> | 1       | (a) Indicate the study's design with a commonly used term in the title or the abstract<br>(b) Provide in the abstract an informative and balanced summary of what was done and what was found                                                                                                                                                                                                                                            |
| <b>Introduction</b>       |         |                                                                                                                                                                                                                                                                                                                                                                                                                                          |
| Background/rationale      | 2       | Explain the scientific background and rationale for the investigation being reported                                                                                                                                                                                                                                                                                                                                                     |
| Objectives                | 3       | State specific objectives, including any prespecified hypotheses                                                                                                                                                                                                                                                                                                                                                                         |
| <b>Methods</b>            |         |                                                                                                                                                                                                                                                                                                                                                                                                                                          |
| Study design              | 4       | Present key elements of study design early in the paper                                                                                                                                                                                                                                                                                                                                                                                  |
| Setting                   | 5       | Describe the setting, locations, and relevant dates, including periods of recruitment, exposure, follow-up, and data collection                                                                                                                                                                                                                                                                                                          |
| Participants              | 6       | (a) Give the eligibility criteria, and the sources and methods of selection of participants. Describe methods of follow-up<br>(b) For matched studies, give matching criteria and number of exposed and unexposed (NA)                                                                                                                                                                                                                   |
| Variables                 | 7       | Clearly define all outcomes, exposures, predictors, potential confounders, and effect modifiers. Give diagnostic criteria, if applicable (NA)                                                                                                                                                                                                                                                                                            |
| Data sources/measurement  | 8*      | For each variable of interest, give sources of data and details of methods of assessment (measurement). Describe comparability of assessment methods if there is more than one group                                                                                                                                                                                                                                                     |
| Bias                      | 9       | Describe any efforts to address potential sources of bias                                                                                                                                                                                                                                                                                                                                                                                |
| Study size                | 10      | Explain how the study size was arrived at                                                                                                                                                                                                                                                                                                                                                                                                |
| Quantitative variables    | 11      | Explain how quantitative variables were handled in the analyses. If applicable, describe which groupings were chosen and why                                                                                                                                                                                                                                                                                                             |
| Statistical methods       | 12      | (a) Describe all statistical methods, including those used to control for confounding<br>(b) Describe any methods used to examine subgroups and interactions<br>(c) Explain how missing data were addressed<br>(d) If applicable, explain how loss to follow-up was addressed<br>(e) Describe any sensitivity analyses                                                                                                                   |
| <b>Results</b>            |         |                                                                                                                                                                                                                                                                                                                                                                                                                                          |
| Participants              | 13*     | (a) Report numbers of individuals at each stage of study—eg numbers potentially eligible, examined for eligibility, confirmed eligible, included in the study, completing follow-up, and analysed<br>(b) Give reasons for non-participation at each stage<br>(c) Consider use of a flow diagram (not included yet, could still be included but I think it is clear from the text and I am not sure whether it increases the readability) |
| Descriptive data          | 14*     | (a) Give characteristics of study participants (eg demographic, clinical, social) and information on exposures and potential confounders<br>(b) Indicate number of participants with missing data for each variable of interest<br>(c) Summarise follow-up time (eg, average and total amount)                                                                                                                                           |
| Outcome data              | 15*     | Report numbers of outcome events or summary measures over time                                                                                                                                                                                                                                                                                                                                                                           |
| Main results              | 16      | (a) Give unadjusted estimates and, if applicable, confounder-adjusted estimates and their precision (eg, 95% confidence interval). Make clear which confounders were adjusted for and why they were included<br>(b) Report category boundaries when continuous variables were categorized<br>(c) If relevant, consider translating estimates of relative risk into absolute risk for a                                                   |



|                          |    |                                                                                                                                                                            |
|--------------------------|----|----------------------------------------------------------------------------------------------------------------------------------------------------------------------------|
|                          |    | meaningful time period                                                                                                                                                     |
| Other analyses           | 17 | Report other analyses done—eg analyses of subgroups and interactions, and sensitivity analyses                                                                             |
| <b>Discussion</b>        |    |                                                                                                                                                                            |
| Key results              | 18 | Summarise key results with reference to study objectives                                                                                                                   |
| Limitations              | 19 | Discuss limitations of the study, taking into account sources of potential bias or imprecision. Discuss both direction and magnitude of any potential bias                 |
| Interpretation           | 20 | Give a cautious overall interpretation of results considering objectives, limitations, multiplicity of analyses, results from similar studies, and other relevant evidence |
| Generalisability         | 21 | Discuss the generalisability (external validity) of the study results                                                                                                      |
| <b>Other information</b> |    |                                                                                                                                                                            |
| Funding                  | 22 | Give the source of funding and the role of the funders for the present study and, if applicable, for the original study on which the present article is based              |

\*Give information separately for exposed and unexposed groups.

**Note:** An Explanation and Elaboration article discusses each checklist item and gives methodological background and published examples of transparent reporting. The STROBE checklist is best used in conjunction with this article (freely available on the Web sites of PLoS Medicine at <http://www.plosmedicine.org/>, Annals of Internal Medicine at <http://www.annals.org/>, and Epidemiology at <http://www.epidem.com/>). Information on the STROBE Initiative is available at <http://www.strobe-statement.org>.
